1 **Title:** Detecting and Reversing Myocardial Ischemia Using an Artificially Intelligent  
2 Bioelectronic Medicine

3

4 **Authors:** Ganzer PD<sup>1\*</sup>, Ph.D.; Loeian MS<sup>1</sup>, Ph.D.; Roof SR<sup>2</sup>, Ph.D.; Teng B<sup>2</sup>, DVM, Ph.D.; Lin  
5 L<sup>3</sup>, Ph.D.; FriedenberG DA<sup>3</sup>, Ph.D.; Baumgart IW<sup>1</sup>, M.S.; Meyers EC<sup>1</sup>, Ph.D.; Chun KS<sup>1</sup>, Ph.D.;  
6 Rich A<sup>3</sup>; Muir WW<sup>2,4</sup>, DVM, PhD; Weber DJ<sup>5</sup>, Ph.D.; Hamlin RL<sup>2,6</sup>, DVM, Ph.D.

7

8 **Affiliations:** <sup>1</sup> Medical Devices and Neuromodulation, Battelle Memorial Institute, 505 King Ave,  
9 Columbus, OH, USA 43201; <sup>2</sup> QTest Labs, 6456 Fiesta Dr, Columbus, OH 43235; <sup>3</sup> Health  
10 Analytics, Battelle Memorial Institute, 505 King Ave, Columbus, OH, USA 43201; <sup>4</sup> College of  
11 Veterinary Medicine, 6965 Cumberland Gap Parkway, Harrogate, TN, USA 37752; <sup>5</sup> Department  
12 of Mechanical Engineering and Neuroscience, Carnegie Mellon University, 5000 Forbes Ave,  
13 Pittsburgh, PA USA 15213; <sup>6</sup> Department of Veterinary Biosciences, The Ohio State University,  
14 1900 Coffey Road, Columbus, OH 43201

15

16 \* Author for correspondence: [ganzer@battelle.org](mailto:ganzer@battelle.org)

17

18 **Summary:** Myocardial ischemia is spontaneous, usually asymptomatic, and contributes to fatal  
19 cardiovascular consequences. Importantly, biological neural networks cannot reliably detect and  
20 correct myocardial ischemia on their own. In this study, we demonstrate an artificially intelligent  
21 and responsive bioelectronic medicine, where an artificial neural network (ANN) supplements  
22 biological neural networks enabling reliable detection and correction of myocardial ischemia.  
23 ANNs were first trained to decode spontaneous cardiovascular stress and myocardial ischemia  
24 with an overall accuracy of ~92%. ANN-controlled vagus nerve stimulation (VNS) reversed the  
25 major biomarkers of myocardial ischemia with no side effects. In contrast, open-loop VNS or  
26 ANN-controlled VNS following a caudal vagotomy essentially failed to reverse correlates of  
27 myocardial ischemia. Lastly, variants of ANNs were used to meet clinically relevant needs,  
28 including interpretable visualizations and unsupervised detection of emerging cardiovascular  
29 stress states. Overall, these results demonstrate that ANNs can supplement deficient biological  
30 neural networks via an artificially intelligent bioelectronic medicine system.

31

32

33

34

35

36

37

38

39 **Keywords:** cardiovascular, myocardial ischemia, decoding, machine learning, artificial  
40 intelligence, closed-loop, bioelectronic medicine, nerve stimulation, clustering, dimensionality  
41 reduction.

42

### 43 **Introduction:**

44

45 Cardiovascular disease is responsible for a staggering ~25-30% of mortality worldwide  
46 (World Health Organization, 2018). One prominent attribute of cardiovascular disease is  
47 myocardial ischemia – caused by a decrease in myocardial oxygen supply and / or an increase in  
48 myocardial oxygen demand (Ardehali & Ports, 1990; Deedwania & Carbajal, 1992; Hinderliter et  
49 al., 1991). Treating myocardial ischemia can reduce rates of myocardial injury, myocardial  
50 infarction, and death (Braun et al., 2018; Conti et al., 2012; Gutterman, 2009; Cohn, 1998).  
51 Unfortunately, treating myocardial ischemia is accompanied by several major challenges.

52 Roughly 75% of ischemic episodes are asymptomatic, where the heart can be irreversibly  
53 damaged without conscious awareness (Gutterman, 2009; Deedwania & Nelson, 1990; Rozanski  
54 & Berman, 1987; Cecchi et al., 1983). This significantly complicates the detection of myocardial  
55 ischemia, and clearly shows that biological neural networks are considerably deficient at detecting  
56 myocardial ischemia. Furthermore, myocardial ischemia can occur at random throughout the day  
57 (Schwartz et al., 2018; Gutterman, 2009; Cecchi et al., 1983), making it difficult to detect and  
58 treat. Supplementing deficient biological neural networks represents a promising approach to more  
59 effectively detect and potentially reverse myocardial ischemia.

60 In this study, we assessed the hypothesis that artificial neural networks (ANNs) can  
61 supplement deficient biological neural networks to detect, and even help correct, myocardial  
62 ischemia. To this end, we used an ANN that rapidly decodes events of spontaneous myocardial  
63 ischemia, and responsively triggers therapeutic closed-loop vagus nerve stimulation (VNS).  
64 Responsive closed-loop VNS may be an effective bioelectronic medicine for reversing ischemia  
65 mediated elevations in chronotropy, afterload, and myocardial oxygen demand (Capilupi et al.,  
66 2020; Levy & Schwartz, 1994; Ardell et al., 2015; Buck et al., 1981).

67 Although promising, implementing an ANN-controlled bioelectronic medicine for  
68 myocardial ischemia is difficult for several reasons. Events of myocardial ischemia are  
69 physiologically variable, within and across subjects (Patel et al., 1996; Celermajer et al., 1994;  
70 Deanfield & Spiegelhalter, 1990; Tzivoni et al., 1987). Furthermore, non-ischemic states have  
71 electrophysiological characteristics similar to myocardial ischemia (e.g., cardiac valve  
72 dysfunction, repolarization abnormalities, or an electrolyte imbalance; Michaelides et al., 2010;  
73 Sapin et al., 1991; Petrov et al., 2012; Gutterman, 2009). Therefore, detecting myocardial ischemia  
74 is complicated by significant biomarker variability and off-target states.

75 The majority of bioelectronic medicines use preprogrammed open-loop stimulation  
76 schedules. However, a closed-loop bioelectronic medicine that selectively responds when needed  
77 can optimize therapeutic efficacy (Wright et al., 2016; Sun & Morell, 2014; Hays, 2016; Ganzer  
78 et al., 2018; Ganzer & Sharma, 2019). Also, myocardial ischemia occurs throughout the day at

79 random (Schwartz et al., 2018; Gutterman, 2009; Cecchi et al., 1983). Therefore, an effective  
80 bioelectronic treatment for myocardial ischemia may need to leverage responsive closed-loop  
81 control – where on-demand stimulation is autonomously triggered when needed for benefit.

82 Lastly, artificial intelligence (AI) is becoming a powerful tool in medicine. Importantly,  
83 AI enabled medicines must be easily interpretable for widespread adoption (Vellido, 2019;  
84 Tonekaboni et al., 2019; Tjoa, E., & Guan, 2019). AI interpretability can be enhanced using  
85 visualizations. However, it can be challenging to create interpretable visualizations of both high-  
86 dimensional data and complex algorithm decisions (Vellido, 2019, 2012, & 2011; Liu et al., 2017;  
87 Zahavy et al., 2016). Furthermore, disease pathophysiology and biomarker data are always  
88 changing – over time, subjects can experience new forms of cardiovascular stress, and new  
89 pathophysiological states may emerge (Epel et al., 2018; Schwartz et al., 2018). Therefore, future  
90 AI enabled medicines will need to be both interpretable and adaptive to physiological changes.

91

## 92 **Results:**

93

### 94 ***Inducing Acute Myocardial Ischemia***

95

96 Clinical myocardial ischemia is associated with enhanced catecholamine tone, increased  
97 afterload, and changes to the myocardial oxygen supply / demand ratio commonly lasting 30  
98 seconds or more (Gutterman, 2009; Rocco et al., 1986; Rehman et al., 1997; Hinderliter et al.,  
99 1991; Deedwania & Nelson, 1990). We modeled these attributes of clinical myocardial ischemia  
100 using injections of dobutamine and norepinephrine in rats. Dobutamine (primarily a  $\beta_1$  receptor  
101 agonist) is commonly used in the clinic to induce cardiovascular stress and subsequent myocardial  
102 oxygen demand (Mandapaka & Hundley, 2006). Norepinephrine (primarily an  $\alpha_1$  receptor  
103 agonist) is extensively implicated in both coronary and peripheral vasoconstriction, cardiovascular  
104 stress, and myocardial ischemia (Heusch G & Ross, 1990; Kawada et al., 2002). Our approach was  
105 motivated by previous studies modeling cardiovascular stress and acute myocardial ischemia using  
106 injected catecholamines (Vimercati et al., 2012; Segar et al., 1995; Barger et al., 1961; Lepeschkin  
107 et al., 1960). We used three types of injections (schematic of experimental interfaces:  
108 Supplemental Fig. S1A): 1) dobutamine alone (D), 2) norepinephrine alone (NE), or dobutamine  
109 and norepinephrine combined (D+NE). Injection protocols consisted of an initial rest period  
110 followed by a 2-minute injection period (injection start = vertical dashed line, Fig. 1B-1E).

111 Each injection type differentially impacted traditional biomarkers of cardiovascular stress  
112 and myocardial ischemia, including heart rate (Fig. 1B), mean arterial pressure (MAP, Fig. 1C),  
113 rate-pressure product (RPP, Fig. 1D), and ST epoch level (Fig. 1E). The combined D+NE injection  
114 tended to have a larger effect on two biomarkers intimately related to myocardial ischemia: 1)  
115 RPP, an index of myocardial oxygen consumption (Gobel et al., 1978; Detry et al., 1970); and 2)  
116 ST epoch depression, a classic electrophysiological correlate of subendocardial ischemia  
117 (Klabunde, 2017). A representative averaged ECG is shown before (Rest, gray; Fig. 1F) and  
118 during D+NE induced myocardial ischemia (D+NE, cyan; Fig. 1F). Electrophysiological  
119 correlates of decreased myocardial membrane potential and ischemic currents (Klabunde, 2017;

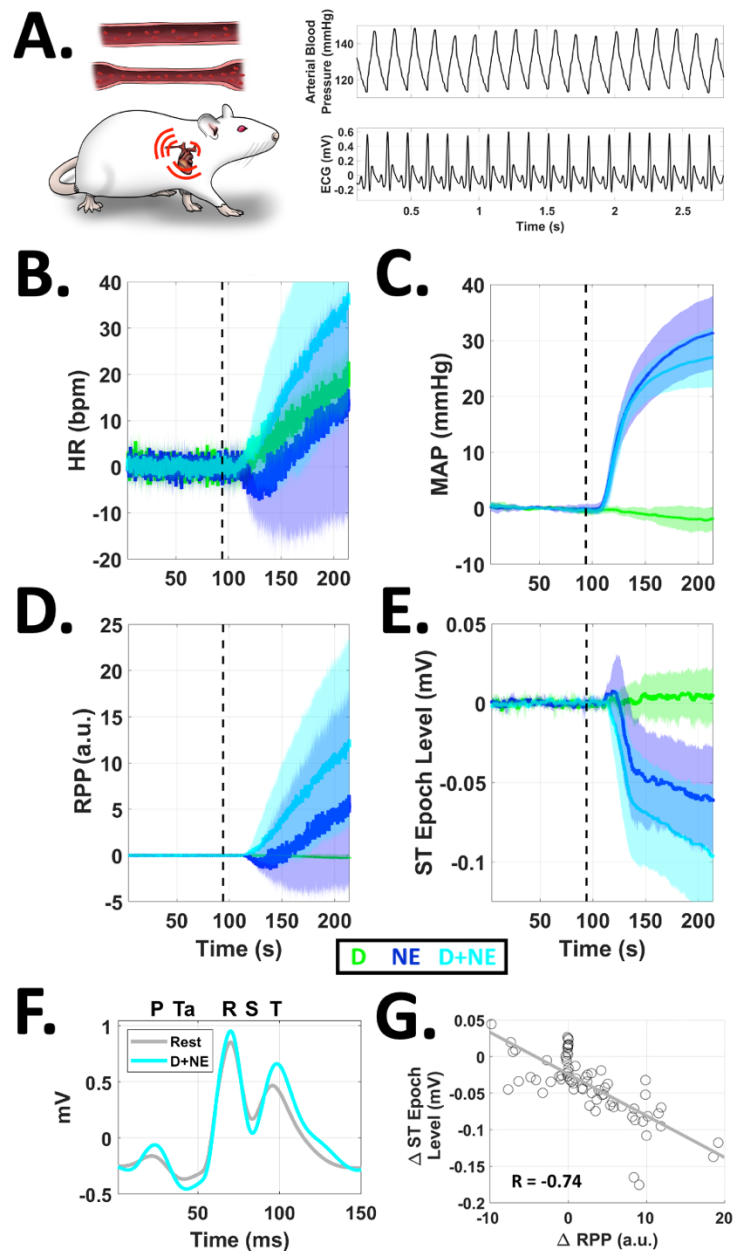

120 **Figure 1. Inducing Acute Myocardial Ischemia *In Vivo*.** **A.** Cartoon of rat experiments for inducing cardiovascular  
 121 stress and myocardial ischemia (blood vessel / vasoconstriction cartoon: top left; heart / tachycardia cartoon: bottom  
 122 left; arterial blood pressure waveforms: top right; electrocardiogram or ECG waveforms: bottom right). Heart rate  
 123 (HR, **B**), mean arterial pressure (MAP, **C**), rate-pressure product (RPP, **D**), and ST epoch level (**E**) were differentially  
 124 modulated following a dobutamine (D, green), norepinephrine (NE, blue), or combined dobutamine and  
 125 norepinephrine (D+NE, cyan) injection, indicative of cardiovascular stress and myocardial ischemia (time series  
 126 include lighter shaded regions =  $\pm$  95% confidence intervals; vertical black dashed line = time of injection). **F.**  
 127 Representative ECG during rest (gray) or D+NE induced myocardial ischemia (cyan). Note the pronounced  
 128 suppression of ECG epochs during both diastole and systole, indicative of ischemic currents (ECG waveforms  
 129 respectively averaged across 10 seconds from each given period; relative P, Ta, R, S, and T ECG wave time points  
 130 shown at top of the panel). **G.** ST epoch level depression was significantly correlated with RPP (RPP = an index of  
 131 myocardial oxygen consumption). These results demonstrate that injected catecholamines differentially impact  
 132 cardiovascular states and can induce acute myocardial ischemia.

133 Janse, 2007; Cinca et al., 1980; Kleber et al., 1978) were observed during both systole (during  
134 QRS) and diastole (during the ST and Ta epochs). Specifically, D+NE induced a maximal ST  
135 epoch depression up to  $\sim 0.1$  mV. ST epoch depression was significantly correlated to RPP across  
136 all injections (Fig. 1G:  $R = -0.74$ ;  $p < 0.001$ ). Therefore, increased subendocardial ischemia was  
137 associated with higher myocardial oxygen consumption. These results demonstrate that  
138 catecholamine injections induce correlates of cardiovascular stress and acute myocardial ischemia.

139

### 140 *Creating Features for Cardiovascular State Decoding*

141

142 We next created a broader set of features from the ECG and blood pressure signals for state  
143 decoding and target ischemia detection (ECG feature schematic: Fig. 2A; blood pressure feature  
144 schematic: Fig. 2B). The broader 13 element feature vector further quantified several biomarkers,  
145 such as ECG segment durations (ms), relative ECG wave point levels (mV), blood pressures during  
146 diastole and systole (mmHg), and breath rate. Changes in features were assessed for D, NE, and  
147 D+NE, quantified with respect to baseline levels (i.e.,  $\Delta$  relative to baseline).

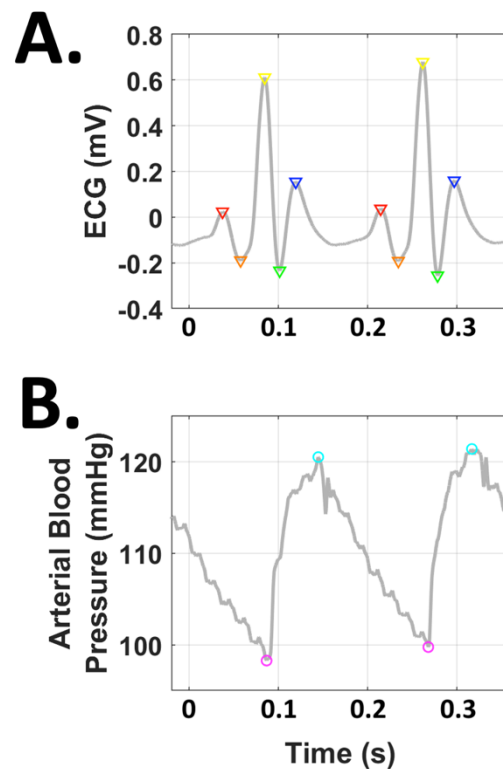

148 **Figure 2. Schematic of Cardiovascular Feature Components.** All 13 cardiovascular features (shown in Figure 3)  
149 were derived from the ECG (A) or arterial blood pressure (B) signals. Across wave cycles, we identified correlates of  
150 the P wave (red triangles, atrial depolarization), Ta wave (orange triangles, atrial repolarization), R wave (yellow  
151 triangles, ventricular depolarization), S wave (green triangles, nadir between ventricular depolarization and  
152 repolarization), T wave (blue triangles, ventricular repolarization), diastolic pressure (magenta circles), and systolic  
153 pressure (cyan circles). Breath rate was derived from the linear envelope of the blood pressure signal. The 13-element  
154 feature vector was calculated every 100 ms, and averaged over a 4 s sliding window. Please see the *On-Line  
155 Cardiovascular Signal Conditioning and Feature Extraction* section of the methods for more details on feature  
156 extraction.

157 Additional biomarkers of cardiovascular stress and myocardial ischemia were observed  
 158 across the added features (Klabunde, 2017; Janse, 2007; Rehman et al., 1997; Deedwania &  
 159 Nelson, 1990; Cinca et al., 1980; Kleber et al., 1978), including increases in pulse pressure,  
 160 decreases in myocardial conduction velocity, and depression of other ECG wave points indicative  
 161 of ischemic currents (Fig. 3A: ECG features; Fig. 3B: blood pressure features; Fig. 3C, pulmonary  
 162 feature; Table 1: omnibus ANOVA results). The combined injection of D+NE also had a maximal  
 163 effect on this broader set of features compared to D or NE. These results demonstrate the more  
 164 distributed impact of catecholamines on broader features of cardiovascular stress and myocardial  
 165 ischemia.

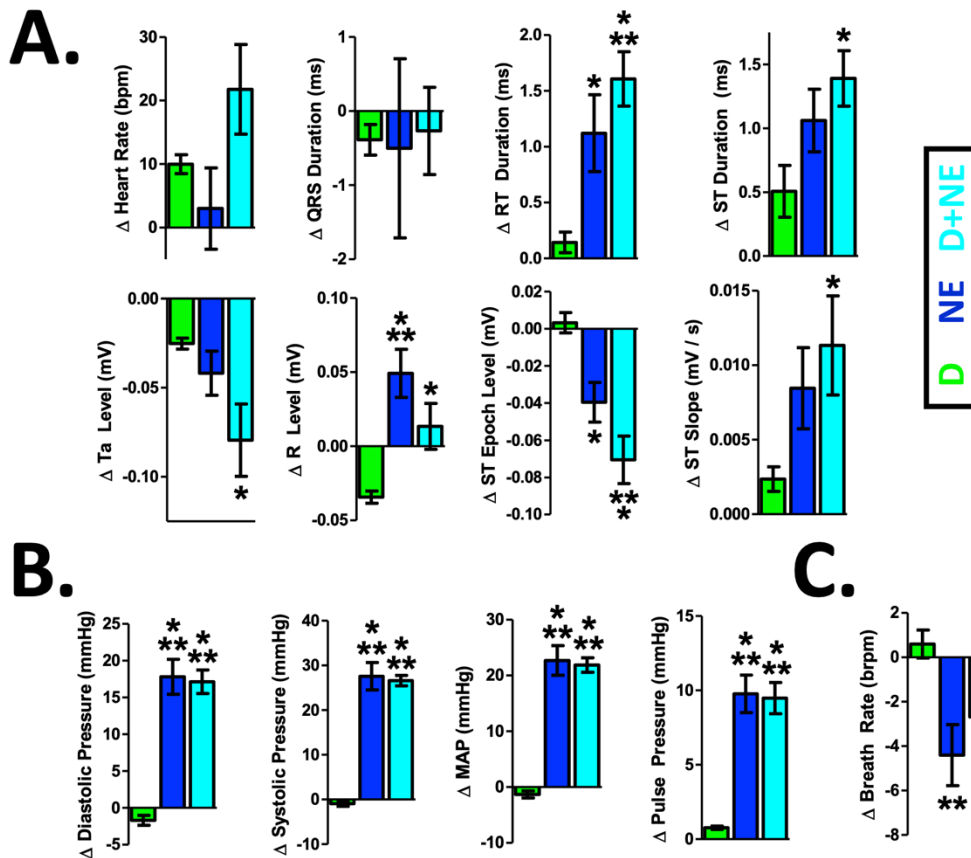

166 **Figure 3. Cardiovascular Feature Changes During Induction of Cardiovascular Stress and Myocardial**  
 167 **Ischemia.** A more detailed 13 element cardiovascular feature vector was created for eventual decoding of  
 168 cardiovascular state. Dobutamine (D, green), norepinephrine (NE, blue), or a combination of dobutamine and  
 169 norepinephrine (D+NE, cyan) induced significant changes to features related to the ECG (A), blood pressure (B), and  
 170 pulmonary function (C). Of note, D+NE maximally impacted several cardiovascular features (\* = different from D at  
 171  $p < 0.05$ ; \*\* = different from D at  $p < 0.01$ ; \*\*\* = different from D at  $p < 0.001$ ). This 13-element feature vector was next  
 172 used for decoding cardiovascular stress and myocardial ischemia. Data presented are mean  $\pm$  SEM.  
 173

174  
 175  
 176

177 **Table 1: Omnibus ANOVA results (related to Fig. 3).**

|                                              | <b>Omnibus ANOVA Results</b> |
|----------------------------------------------|------------------------------|
| $\Delta$ Feature 1 (Heart Rate)              | F[2,24] = 2.8, p = 0.07      |
| $\Delta$ Feature 2 (QRS Duration)            | F[2,24] = 0.02, p = 0.97     |
| $\Delta$ Feature 3 (RT Duration)             | F[2,24] = 8.9, p < 0.01      |
| $\Delta$ Feature 4 (ST Duration)             | F[2,24] = 4, p < 0.05        |
| $\Delta$ Feature 5 (Ta Level)                | F[2,24] = 4, p < 0.05        |
| $\Delta$ Feature 6 (R Level)                 | F[2,24] = 10.1, p < 0.001    |
| $\Delta$ Feature 7 (ST Epoch Level)          | F[2,24] = 13.3, p < 0.001    |
| $\Delta$ Feature 8 (ST Slope)                | F[2,24] = 3.2, p < 0.05      |
| $\Delta$ Feature 9 (Diastolic Pressure)      | F[2,24] = 44.2, p < 0.001    |
| $\Delta$ Feature 10 (Systolic Pressure)      | F[2,24] = 71.3, p < 0.001    |
| $\Delta$ Feature 11 (Mean Arterial Pressure) | F[2,24] = 60.7, p < 0.001    |
| $\Delta$ Feature 12 (Pulse Pressure)         | F[2,24] = 28.9, p < 0.001    |
| $\Delta$ Feature 13 (Breath Rate)            | F[2,24] = 7.3, p < 0.01      |

178

179 Importantly, biomarker features of myocardial ischemia can be variable within and across  
180 subjects (Patel et al., 1996; Celermajer et al., 1994; Deanfield & Spiegelhalter, 1990; Tzivoni et  
181 al., 1987). Furthermore, seemingly separate cardiovascular states can exhibit highly correlated  
182 biomarkers and thus statistically overlap (Sharma & Gedeon, 2012; Michaelides et al., 2010;  
183 Petrov et al., 2012; Sapin et al., 1991; Gutterman, 2009). Therefore, both biomarker variability and  
184 correlation across states should be attributes of a myocardial ischemia model.

185 The cardiovascular feature data (from Fig. 3) exhibited variability and disorder comparable  
186 to human cardiovascular data recorded in either the intensive care unit (Supplemental Fig. S2A;  
187 Kim et al., 2016; Goldberger et al., 2000) or during ambulatory episodes of myocardial ischemia  
188 (Supplemental Fig. S2B; Taddei et al., 1992; Jager et al., 2003; Goldberger et al., 2000).  
189 Furthermore, there was a significant correlation between NE and D+NE, even though they are  
190 distinct and separate cardiovascular stress states (Supplemental Fig. S2C). These findings  
191 demonstrate that the recorded cardiovascular features importantly model the variability and state  
192 overlap seen during human cardiovascular stress and myocardial ischemia, a clinically relevant  
193 challenge for cardiovascular state decoding.

194

### 195 ***Decoding Complex Cardiovascular States Using an Artificial Neural Network***

196

197 Biological neural networks are largely incapable of detecting myocardial ischemia (~75%  
198 of episodes are asymptomatic: Gutterman, 2009; Deedwania & Nelson, 1990; Rozanski & Berman,  
199 1987; Cecchi et al., 1983). An artificial neural network (ANN) may be able to supplement deficient  
200 biological neural networks to reliably detect, and even help correct, myocardial ischemia. We  
201 developed an ANN architecture to decode cardiovascular states during cardiovascular stress and  
202 myocardial ischemia, comprised of both a hidden dense layer and a hidden long short-term

203 memory (LSTM) layer (4 total layers, schematic in Supplemental Fig. S3A; see the *Decoding*  
 204 *Myocardial Demand Ischemia Using an Artificial Neural Network* section of the methods for more  
 205 details). A LSTM layer was incorporated to detect long-term dependencies across time in the  
 206 cardiovascular data and potentially enhance decoding performance (Murat et al., 2020; Gers et al.,  
 207 1999). The output of the ANN is a continuous prediction score across the 4 states: rest (no drug  
 208 injected), D, NE, or D+NE (example decoder outputs during a D+NE injection: Supplemental Fig.  
 209 S3B).

210 Despite significant feature variability and state overlap, the ANN decoded cardiovascular  
 211 state with high overall accuracy (~92%, Fig. 4 & Supplemental Fig. S3C;  $F[3,36] = 163.5$ ,  $p <$   
 212  $0.001$ ). Replacing the LSTM layer with a normal dense layer removed the network's ability to  
 213 assess long term dependencies in the signal, significantly decreasing accuracy (i.e., an ANN-NO-  
 214 LSTM architecture; Supplemental Fig. S3C). The ANN also outperformed other classifiers such  
 215 as a support vector machine or a linear discriminant analysis (Supplemental Fig. S3C).

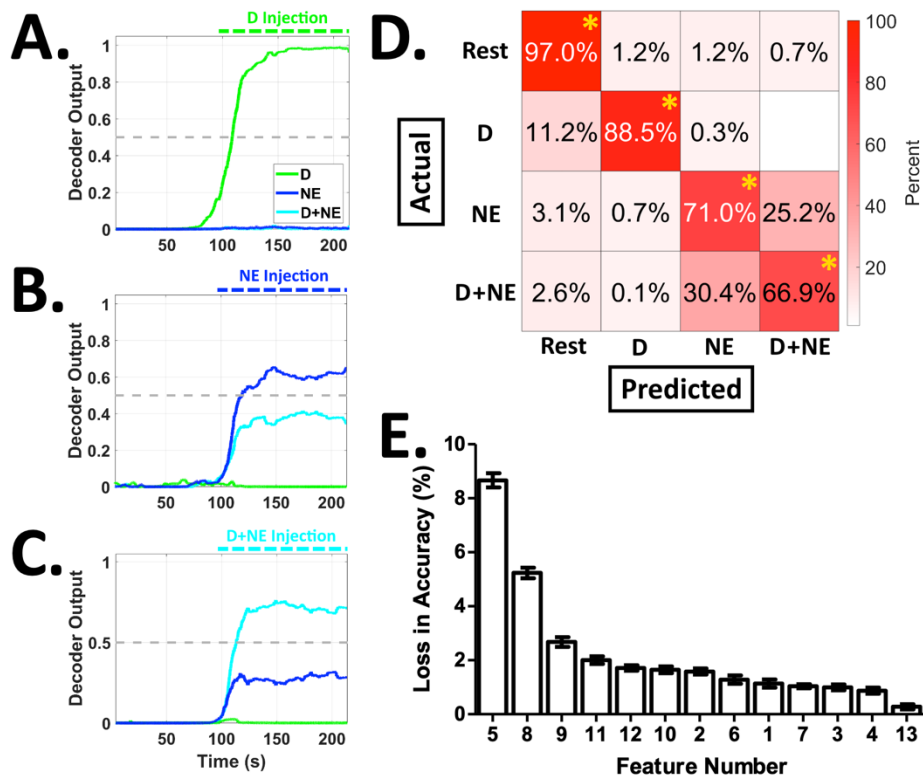

216 **Figure 4. The ANN Accurately Classifies Cardiovascular Stress States and is Significantly Impacted by the**  
 217 **Removal of Features Related to Cardiac Electrophysiology & Vascular Resistance.** The ANN was challenged to  
 218 decode complex cardiovascular state changes (cardiovascular feature variability and state overlap assessment:  
 219 Supplemental Fig. S2) across a total of 4 classes: Rest, D, NE, or D+NE. Continuous decoder outputs are shown for  
 220 the injection of D (panel A), NE (panel B), or D+NE (panel C). The ANN performed with a high overall accuracy  
 221 (~92%) and sensitivity (~86%) (confusion matrix showing average performance values: panel D; \* = above chance at  
 222  $p < 0.001$ ). E. The removal of features related to ECG ischemic currents (features 5 & 8) or blood pressure (features 9-  
 223 12) led to the largest losses in decoding accuracy. These results show that an ANN can accurately decode  
 224 cardiovascular states, despite significant cardiovascular feature variability and state overlap. Data presented are mean  
 225  $\pm$  SEM.  
 226



227 The ANN exhibited an overall sensitivity of ~86% (example decoder outputs: Fig. 4A-4C;  
228 confusion matrix showing average performance values: Fig. 4D). Although the ANN had an  
229 overall accuracy of ~92%, the most common misclassification was between the NE and D+NE  
230 classes (potentially due to their high degree of variability and correlation, as shown in Fig. 1, Fig.  
231 3, and Supplemental Fig. S2C). Features related to ECG wave point depression, ischemic currents,  
232 and vascular resistance were the most important features for ANN decoding performance (Fig. 4E  
233 and Table 2). Lastly, a fixed ANN trained on subsets of the data robustly generalized to testing  
234 days spread out over several months and different animals (Supplemental Fig. S4). Overall, these  
235 results show that ANNs can robustly decode complex cardiovascular states to supplement deficient  
236 biological neural networks.

237

238 **Table 2. Feature number and name, ranked according to loss in accuracy (i.e., highest loss**  
239 **to lowest loss; related to Fig. 4E).**

| Feature Number (Fig. 4E) | 5        | 8        | 9                  | 11                     | 12             | 10                | 2            | 6       | 1          | 7              | 3           | 4         | 13          |
|--------------------------|----------|----------|--------------------|------------------------|----------------|-------------------|--------------|---------|------------|----------------|-------------|-----------|-------------|
| Feature Name             | Ta Level | ST Slope | Diastolic Pressure | Mean Arterial Pressure | Pulse Pressure | Systolic Pressure | QRS Duration | R Level | Heart Rate | ST Epoch Level | RT Duration | ST Length | Breath Rate |

240

### 241 *Responsive ANN Controlled Vagus Nerve Stimulation Reverses Myocardial Ischemia*

242

243 Myocardial ischemia can cause irreversible heart damage if not treated rapidly. Therefore,  
244 beyond rapid detection alone, rapid myocardial ischemia correction is also needed. We next  
245 leveraged the ANN decoder to enable closed-loop vagus nerve stimulation (VNS) and potentially  
246 reverse myocardial ischemia (i.e., ANN-VNS; cartoon schematic: Fig. 5A). VNS can decrease  
247 chronotropy, afterload, and myocardial oxygen demand (Capilupi et al., 2020; Levy & Schwartz,  
248 1994; Buck et al., 1981), all factors that are elevated during spontaneous myocardial ischemia  
249 (Svensson et al., 2001; Rehman et al., 1997; Deedwania & Carbajal, 1992; Hinderliter et al., 1991;  
250 Deedwania & Nelson, 1990). D+NE targets catecholamine receptors relevant for myocardial  
251 ischemia and has a maximal effect on the recorded features. Therefore, we targeted D+NE induced  
252 myocardial ischemia for detection and correction, using ANN-VNS.

253 In real-time and *in vivo*, the ANN detected spontaneous D+NE induced myocardial  
254 ischemia with high overall accuracy (~94%, Supplemental Fig. S5A; average decoder outputs:  
255 Supplemental Fig. S5B), similar to offline performance (~92%). ANN-VNS reversed pathological  
256 changes in heart rate, MAP, RPP, and ST epoch level (Fig. 5C, Isch. + ANN-VNS, red), compared  
257 to D+NE ischemia alone (Fig. 5C, Isch., cyan; Heart Rate:  $F[2,20] = 29.6$ ,  $p < 0.001$ ; MAP:  $F[2,20]$   
258  $= 5$ ,  $p < 0.05$ ; RPP:  $F[2,20] = 14.2$ ,  $p < 0.001$ ; ST Epoch Level:  $F[2,20] = 7.6$ ,  $p < 0.01$ ; full 13-  
259 element feature vector shown in Supplemental Fig. S6A; experimental schematic: 4B). Open-loop  
260 VNS failed to reverse any major correlates of D+NE induced myocardial ischemia  
261 pathophysiology (Fig. 5C, Isch. + OL-VNS, magenta; open-loop VNS = 20% duty cycle, with a  
262 balanced amount of VNS compared to the closed-loop ANN-VNS paradigm, and parameters  
263 similar to previous human open-loop VNS studies: Anand et al., 2020; Table 1: Radcliffe et al.,

264 2020; full 13-element feature vector shown in Supplemental Fig. S6B; experimental schematic:  
 265 Fig. 5B, magenta). There were no significant side effects across groups related to breath rate or  
 266 blood oxygen saturation (Fig. 5D; Breath Rate:  $F[2,20] = 0.9$ ,  $p = 0.41$ ;  $SpO_2$ :  $F[2,20] = 0.4$ ,  $p =$   
 267  $0.63$ ). Importantly, only ANN-VNS significantly mitigated a side effect related to arrhythmia  
 268 probability (Fossa, 2017), and therefore enhanced myocardial electrical stability (Fig. 5D; QT /  
 269 TQ ratio:  $F[2,20] = 9.3$ ,  $p < 0.01$ ). These findings demonstrate that pre-programmed open-loop  
 270 VNS misses spontaneous myocardial ischemia that ANN-VNS is designed to respond to and

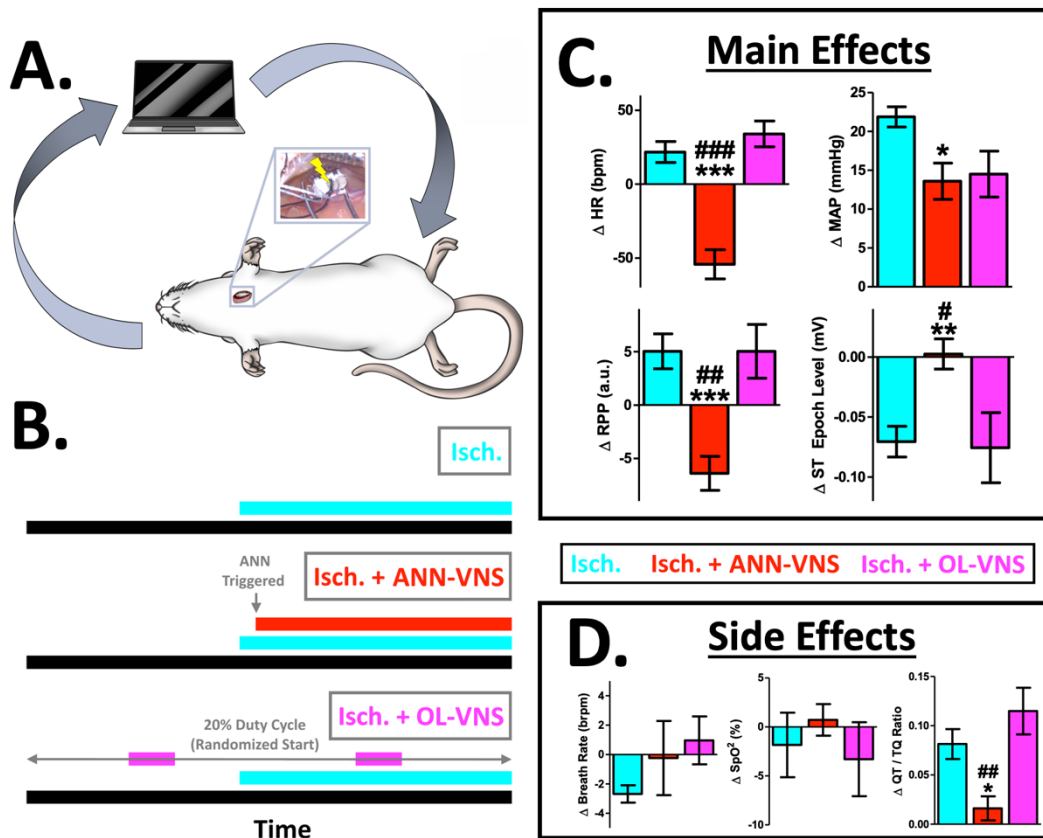

271  
 272 **Figure 5. ANN Controlled Vagus Nerve Stimulation (ANN-VNS) Reverses Several Pathophysiological**  
 273 **Correlates of Myocardial Ischemia Without Significant Side Effects.** **A.** The ANN was next used on-line *in vivo*  
 274 for rapid detection of spontaneous myocardial ischemia and control of vagus nerve stimulation (ANN-VNS; inset: left  
 275 cervical vagus nerve and VNS cuff during dissection). **B.** We assessed biomarkers of cardiovascular stress and  
 276 myocardial ischemia during either D+NE ischemia alone (cyan, Isch.), D+NE ischemia & closed-loop ANN-VNS  
 277 (red, Isch. + ANN-VNS), and D+NE ischemia & open-loop VNS (magenta, Isch. + OL-VNS). Only closed-loop ANN  
 278 controlled VNS (red, Isch. + ANN-VNS) reversed several biomarkers of myocardial ischemia, including heart rate,  
 279 ST epoch level (electrophysiological correlate of subendocardial ischemia), rate-pressure product (RPP, index of  
 280 myocardial oxygen consumption), and mean arterial pressure (MAP, correlate of afterload). Open-loop VNS  
 281 (magenta, Isch. + OL-VNS) failed to reverse correlates of myocardial ischemia, and was essentially no different from  
 282 myocardial ischemia alone (cyan, Isch.) (different from Isch. at:  $p < 0.001 = ***$ ,  $p < 0.01 = **$ , or  $p < 0.05 = *$ ; different  
 283 from Isch. + OL-VNS at:  $p < 0.001 = ###$ ,  $p < 0.01 = ##$ , or  $p < 0.05 = \#$ ). **D.** There were no significant differences in  
 284 breath rate or blood oxygen saturation across groups ( $SpO_2$  = blood oxygen saturation). Importantly, only closed-loop  
 285 ANN-VNS significantly mitigated a side effect related to arrhythmia probability (QT / TQ ratio, averaged across ECG  
 286 cycles). These results demonstrate the ability of ANNs to supplement biological neural networks and facilitate the  
 287 reversal of spontaneous myocardial ischemia *in vivo* using a bioelectronic medicine. Data presented are mean  $\pm$  SEM.

288 correct. Overall, these results support the hypothesis that ANNs can supplement deficient  
289 biological neural networks in a number of ways: not only via detection, but also using bioelectronic  
290 control for correction of spontaneous cardiovascular pathophysiology.

291 Lastly, we performed a vagotomy caudal to the VNS site to examine the role of efferent  
292 vagal fiber activation. Caudal vagotomies blocked the major effects of ANN-VNS, indicating that  
293 the efferent fibers are critical for the therapeutic effects of ANN-VNS (Supplemental Fig. S6C,  
294 orange). Lastly, all 3 VNS groups received an equivalent amount of VNS (Supplemental Fig. S5C;  
295  $F[2,14] = 1.3$ ,  $p = 0.28$ ). These additional findings show that both the vagal fibers engaged, and  
296 VNS timing (not necessarily VNS quantity), play critical roles in myocardial ischemia reversal.

297

### 298 *Detecting New Emerging Stress States Using ANN Autoencoders*

299

300 Our next set of experiments addressed the need for decoding architectures to adapt as  
301 physiology changes. Over time, subjects can engage in new activities, and new forms of  
302 cardiovascular stress can emerge (Epel et al., 2018; Schwartz et al., 2018). A clinically deployed  
303 decoding architecture will fail if it is not capable of detecting new emerging physiological states.  
304 We assessed techniques potentially capable of detecting new, unknown, and emerging stress states  
305 (emerging state / outlier detection review: Park, 2019). To model new unknown emerging stress,  
306 we used feature data recorded during a higher magnitude of cardiovascular stress and myocardial  
307 ischemia (i.e., at a higher dose level; emerging stress states: H-D, H-NE, and H-D+NE). A subset  
308 of the detection techniques used an ANN approach (i.e., autoencoders).

309 LSTM autoencoders (LSTM-AE) detected new emerging stress states with a sensitivity of  
310 ~99%, even though the network was not exposed to these states during training (Fig. 6A;  $F[2,27]$   
311  $= 26$ ,  $p < 0.001$ ; reconstruction loss distributions for known and unknown stress data:  
312 Supplemental Fig. S7; no significant differences for 'known state', i.e., D, NE, and D+NE,  
313 sensitivity across the 3 techniques,  $F[2,27] = 2.1$ ,  $p = 0.13$ ). Using sparse autoencoders removed  
314 the ability to assess long term dependencies in the data, significantly decreasing emerging stress  
315 state detection performance (i.e., no LSTM components, a Sparse-AE; Fig. 6A). The ANN enabled  
316 LSTM-AE also outperformed the widely used isolation forest technique (Fig. 6A). These results  
317 further demonstrate how biological neural networks can be supplemented with ANNs, and suggest  
318 that ANNs can also potentially adapt to new emerging physiological changes.

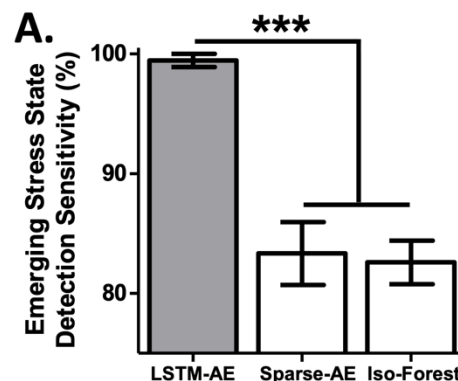

319 **Figure 6. Detecting New Emerging Cardiovascular Stress States.** A. We implemented techniques for detecting  
320 new emerging stress states (new emerging stress states = high dose versions of D, NE, and D+NE). LSTM  
321 autoencoders (LSTM-AE) significantly outperformed the sparse autoencoder (Sparse-AE) and isolation forest (Iso-  
322 Forest) approaches (\*\*\*) = different at  $p < 0.001$ ). These results support the hypothesis that ANNs can also be used to  
323 detect new emerging stress states, as physiology evolves over time. Data presented are mean  $\pm$  SEM.

324

325 *Enabling Interpretable and Adaptive AI: Visualizing Emerging Stress States Within the*  
326 *'Cardiovascular Latent Space' and Unsupervised Dissociation of Different Emerging Stress*  
327 *Types*

328 AI enabled medicines can suffer from a lack of interpretability – where either data or  
329 algorithm decisions cannot be readily understood. AI enabled medicines must be easily  
330 interpretable for widespread adoption (Vellido, 2019; Tonekaboni et al., 2019; Tjoa, E., & Guan,  
331 2019). Visualizations are one solution for creating interpretable representations of both high-  
332 dimensional data and complex algorithm decisions.

333 We next created an interpretable visualization of all known and new emerging stress states  
334 (Fig. 7A; using the LSTM-AE hidden layer, and the dimensionality reduction technique uniform  
335 manifold approximation and projection, or UMAP; McInnes & Healy, 2018). This architecture  
336 approach has recently achieved state-of-the-art performance converting complex high dimensional  
337 data into interpretable representations (McConville et al., 2019). Across all stress states, the  
338 uninterpretable high dimensional LSTM-AE hidden layer (256 dimensions) was transformed to an  
339 interpretable 2-dimensional representation (Supplemental Video 1, Fig. 7B, & Supplemental Fig.  
340 S8). In this 'cardiovascular latent space', known and new emerging states formed clear clusters  
341 (Fig. 7B). Furthermore, known and new emerging stress states generally occupied separate regions  
342 of the 'cardiovascular latent space' at ~85% accuracy, performing well above chance levels ( $t[18]$   
343 = 7.1,  $p < 0.001$ ; data from all 10 folds: Supplemental Fig. S8; performance = ability to separate  
344 the known and new emerging stress state clusters using a linear boundary). This interpretable  
345 visual information showcases the ability of ANNs to help meet clinical needs and create  
346 meaningful representations of complex high-dimensional cardiovascular data, even though the  
347 architecture has never been exposed to the new emerging stress state data.

348 Emerging state detection architectures should also be able to autonomously identify  
349 different types of emerging states, if multiple types exist. Unfortunately, this is exceedingly  
350 challenging, as the architecture cannot be exposed to one or multiple types of new emerging stress  
351 states during training. To address this challenge, our final analyses leveraged the LSTM-AE  
352 enabled 'cardiovascular latent space' combined with unsupervised clustering (unsupervised  
353 clustering method: hierarchical density-based spatial clustering of applications with noise or  
354 HDBSCAN; Campello et al., 2013). This fully unsupervised architecture achieved 78%  
355 performance when challenged to autonomously identify different types of emerging stress states,  
356 performing well above chance levels (Fig. 7C; i.e., unsupervised dissociation of varying  
357 combinations of H-D, H-NE, and H-D+NE;  $t[18] = 20.1$ ,  $p < 0.001$ ; performance metric = V-  
358 measure \* 100%, Rosenberg & Hirschberg, 2007; V-measure is a well-studied metric for quantify

359 clustering and detection capability; Supplemental Fig. S9: separate completeness, homogeneity,  
360 and performance values for all 7 emerging stress state scenarios). The architecture achieved this  
361 performance, in spite of unsupervised operation and significant out of sample generalization to  
362 multiple types of new emerging stress states. Overall, these results show that ANNs can further  
363 enable an interpretable unsupervised emerging state detection architecture, relevant for adapting  
364 to physiological changes over time.

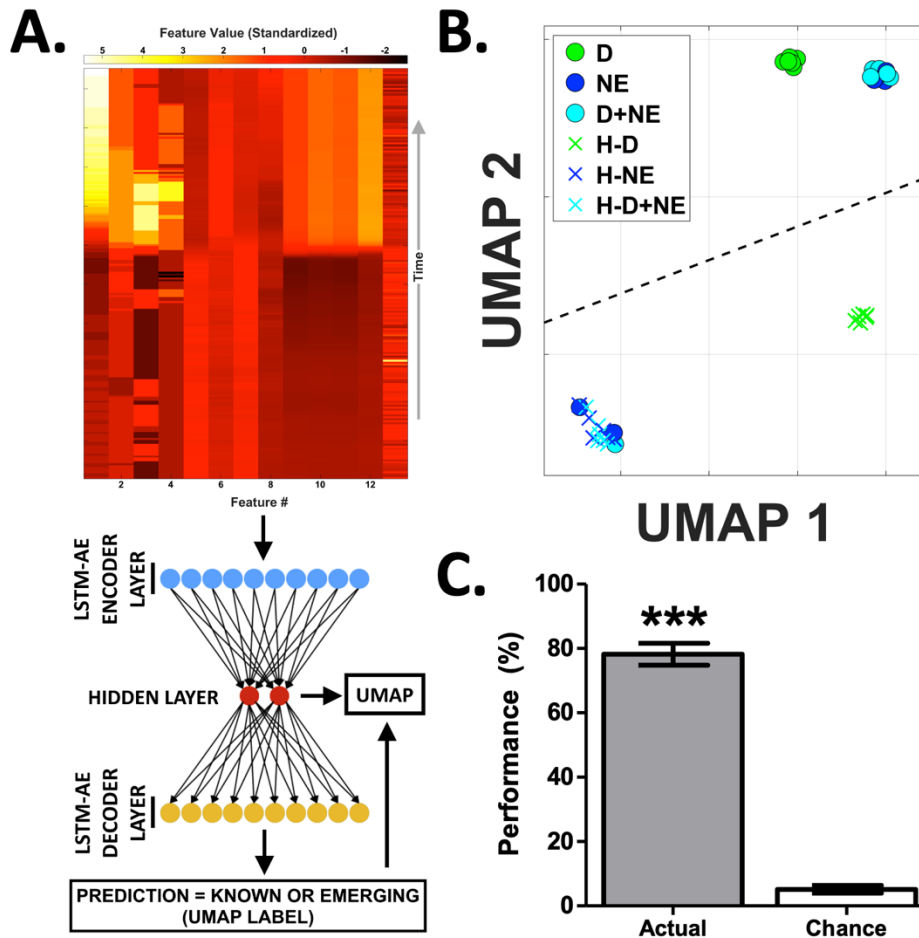

365  
366 **Figure 7. Leveraging the ‘Cardiovascular Latent Space’ for Unsupervised Identification of New Emerging**  
367 **Cardiovascular Stress States.** **A.** Schematic of the emerging state detection architecture. For a given stress state  
368 observation, the feature matrix (top) is passed into the LSTM-AE (consisting of the encoder, hidden layer, and decoder  
369 components; LSTM-AE cartoon not to scale). Using the reconstruction loss, the LSTM-AE then predicts whether the  
370 given observation is a known or new emerging stress state. This prediction is then used as a label for UMAP  
371 dimensionality reduction and subsequent visualization of the LSTM-AE’s processes (see Supplemental Video 1 for a  
372 representative movie of these processes). **B.** The hidden layer of the LSTM-AE is an uninterpretable 256-dimensional  
373 vector. We next generated an interpretable version of all known and unknown stress states using a combination of the  
374 LSTM-AE hidden layer and the dimensionality reduction technique UMAP (uninterpretable input = 256 dimensions;  
375 interpretable output = 2 dimensions). This ‘cardiovascular latent space’ interestingly contained clustering of known  
376 (circles) and unknown emerging stress states (X’s), indicating that the ‘cardiovascular latent space’ may also be useful  
377 for identifying different types of new emerging stress states (plotted data is representative of overall performance;  
378 black dashed line: linear decision boundary, calculated using a SVM). **C.** We next combined the ‘cardiovascular latent  
379 space’ with unsupervised clustering to potentially identify different types of new emerging stress states (via

380 hierarchical density based spatial clustering of applications with noise, or HDBSCAN). This fully unsupervised  
381 method achieved 78% performance when challenged to autonomously detect emerging stress states, performing well  
382 above chance performance levels (\*\*\*) = different from chance at  $p < 0.001$ ). Data presented are mean  $\pm$  SEM. Overall,  
383 these findings show that an ANN can help enable an interpretable and unsupervised emerging state detection  
384 architecture, relevant for a detection system that can adapt as physiology changes.

385

## 386 **Discussion:**

387

388 "It is hard to understand the biological strategy and hence development of a system providing the  
389 wild animal with hundreds of fibers exclusively designed for signaling unlikely coronary  
390 emergencies"

391 -Alberto Malliani (Malliani, 1986)

392

393 In this study, we demonstrate several ways ANNs can supplement deficient biological  
394 neural networks. ANNs effectively decoded cardiovascular states with high accuracy, even though  
395 biomarkers exhibited significant variability and state overlap, similar to human myocardial  
396 ischemia. Beyond detection alone, an ANN enabled bioelectronic medicine reversed myocardial  
397 ischemia by reactively triggering VNS to reduce correlates of chronotropy, afterload, and  
398 myocardial oxygen demand. Preprogrammed open-loop VNS or ANN-VNS without efferent vagal  
399 fibers intact both failed to reverse myocardial ischemia, demonstrating the importance of VNS  
400 timing and vagal fibers engaged. Lastly, ANNs enabled clinically relevant interpretable  
401 visualizations and adaptive detection of emerging cardiovascular stress. This study demonstrates  
402 for the first time that ANNs can supplement deficient cardiovascular biological neural networks  
403 via an artificially intelligent bioelectronic medicine system.

404

## 405 ***Supplementing Deficient Biological Neural Networks with Artificial Neural Networks***

406

407 It is exceedingly problematic that the leading cause of mortality world-wide -  
408 cardiovascular disease and myocardial ischemia - largely develops without conscious awareness.  
409 ~75% of myocardial ischemia events are asymptomatic and therefore subperceptual, known as  
410 'silent myocardial ischemia' (Gutterman, 2009; Deedwania & Nelson, 1990; Rozanski & Berman,  
411 1987; Cecchi et al., 1983). Furthermore, up to ~50% of myocardial infarctions (i.e., 'heart attacks')  
412 are also asymptomatic and happen without any sensation (Soliman, 2019). These significant  
413 deficits in biological neural networks likely come from several sources.

414 Firstly, deficient detection of myocardial ischemia may be due to evolutionary constraints.  
415 Several human-related factors that contribute to cardiovascular disease are relatively new from an  
416 evolutionary perspective, including consuming high-fat foods, smoking, or a sedentary lifestyle  
417 (Ding & Kullo, 2009). Therefore, there may have been insufficient time to develop an effective  
418 cardiovascular pathophysiology detection system in humans, via evolutionary modifications to  
419 neural systems or other mechanisms (Kember et al., 2013; Ding & Kullo, 2009; Malliani, 1986).

420 Secondly, ischemia itself and other diseases contribute to deficient detection of myocardial  
421 ischemia. Symptomatic ischemia, known as angina, only comprises ~25% of all ischemic events  
422 and is often misdiagnosed as off-target musculoskeletal pain, making it difficult to diagnose  
423 accurately (Gutterman, 2009; Swap & Nagurney, 2005). Even when angina occurs, subsequent  
424 ischemic events can be silenced and become asymptomatic, via desensitization of afferent  
425 signaling (known as ‘neural stunning’: Gutterman, 2009; Pomblum et al., 2010). Lastly,  
426 cardiovascular disease can accompany other disorders such as diabetes. Diabetic autonomic  
427 neuropathy further impairs myocardial ischemia signaling, degrading neural sensing systems  
428 innervating the heart (Tabibiazar & Edelman, 2003; Pop-Busui, 2010).

429 Regardless of the mechanism, biological neural networks are largely incapable of reliably  
430 detecting myocardial ischemia. In this study, we address this deficiency of biological neural  
431 networks using ANNs. Future approaches that supplement biological neural networks using ANNs  
432 hold significant promise for mitigating numerous shortcomings of physiological systems.

433 Biological neural networks and ANNs have had a long history together. These interactions  
434 range from the early days of parallel distributed processing to recent ANN architectures that mimic  
435 mammalian neural systems (reviews: Hassabis et al., 2017; Marblestone et al., 2016). Aside from  
436 controlling a therapeutic device during disease, ANNs can now also assist healthy humans (e.g.,  
437 medical diagnoses, self-driving cars, military applications, and more: Wilson & Daugherty, 2018;  
438 Jarrahi, 2018). These findings further highlight several areas of opportunity for ANNs to enhance  
439 human function, during either disease or even healthy states.

440

### 441 *Reversing Spontaneous Myocardial Ischemia Using A Responsive Closed-loop Bioelectronic* 442 *Medicine*

443

444 High rates of ‘silent myocardial ischemia’ lead to increases in myocardial injury,  
445 myocardial infarction, and sudden death (Conti et al., 2012; Gutterman, 2009; Lotze et al., 1999;  
446 Deedwania & Carbajal, 1990). Treating silent or symptomatic myocardial ischemia reduces rates  
447 of myocardial injury, myocardial infarction, and death (Braun et al., 2018; Conti et al., 2012;  
448 Gutterman, 2009; Cohn, 1998). Treating myocardial ischemia using a pharmacological medicine  
449 can promote vasodilation and / or reestablish an appropriate myocardial oxygen supply-demand  
450 ratio (Balla et al., 2018; Cohn, 1998). VNS mimics these desired effects via cholinergic  
451 modulation, decreasing intracellular calcium, presynaptic inhibition of norepinephrine release,  
452 coronary vasodilation, and other mechanisms (Capilupi et al., 2020; Ardell et al., 2015; Levy &  
453 Schwartz, 1994). Bioelectronic control of these physiological cascades motivated the use of VNS  
454 in this study.

455 Bioelectronic medicines are beginning to address several shortcomings of pharmacological  
456 medicines (Ganzer & Sharma, 2019; Vitale & Litt, 2018; Birmingham et al., 2014). Although  
457 pharmacological medicines can be effective, they do not target specific tissues leading to side-  
458 effects. Bioelectronic medicines can address this limitation, via stimulating specific nerves, and  
459 therefore targeting specific tissues, for a localized effect. Furthermore, several disease episodes

460 are spontaneous and may only occur for several minutes a day. Bioelectronic medicines can be  
461 dynamically switched on and off as needed, unlike pharmacological medicines that are active for  
462 several hours a day. Importantly, bioelectronic medicines can provide on-demand benefit via  
463 closed-loop activation. This on-demand attribute of bioelectronic medicine can reduce  
464 desensitization of target receptors, further mitigate side effects, and ultimately improve therapeutic  
465 efficacy. Overall, bioelectronic medicines mitigate several shortcomings of pharmacological  
466 medicines, providing spatial and temporal specificity to improve therapeutic outcomes and reduce  
467 off target effects.

468 Our findings extend previous studies that apply vagal modulation during myocardial  
469 ischemia (Machada et al., 2020; Nuntaphum et al., 2018; Del Rio et al., 2008; Vanoli et al., 1991;  
470 Buck et al., 1981; Meyers et al., 1974), and specifically highlight the importance of responsive  
471 closed-loop VNS control (Fig. 5 and Supplemental Fig. S6). Notably, only responsive closed-loop  
472 VNS (with efferent vagal fibers intact) reversed major correlates of myocardial ischemia (Fig. 5  
473 and Supplemental Fig. S6). Efferent cervical vagal fibers innervate both the atria and ventricles  
474 (Capilupi et al., 2020; Levy & Schwartz, 1994). Acetylcholine release from efferent vagal fibers  
475 can mitigate elevated chronotropy, inotropy, afterload, and myocardial oxygen consumption seen  
476 during myocardial ischemia (Capilupi et al., 2020; Levy & Schwartz, 1994; Ardell et al., 2015;  
477 Nuntaphum et al., 2018; Del Rio et al., 2008; Vanoli et al., 1991; Buck et al., 1981; Meyers et al.,  
478 1974). Our results demonstrate that closed-loop intact VNS decreases overall myocardial work,  
479 important for preventing cell death and injury during myocardial ischemia.

480 During myocardial ischemia alone, we observed depression of ECG segments during both  
481 systole and diastole (Fig. 3). These ECG epochs depress during the initial stages of myocardial  
482 ischemia, indicative of ischemic currents (Klabunde, 2017; Janse, 2007; Cinca et al., 1980; Kleber  
483 et al., 1978). Closed-loop intact VNS reduced chronotropy, afterload, myocardial oxygen  
484 consumption, and other factors leading to a full reversal of ST epoch depression. This result  
485 importantly demonstrates the complete reversal of subendocardial ischemia (Klabunde, 2017)  
486 during closed-loop intact VNS (Fig. 5). These findings support the hypothesis that closed-loop  
487 intact VNS suppresses these ischemic currents, via a responsive increase in parasympathetic drive  
488 restoring myocardial oxygen balance.

489 Lastly, the cardiovascular effects of VNS required precise timing and delivery of  
490 stimulation during spontaneous ischemic episodes. Open-loop VNS was not programmed to  
491 respond during spontaneous myocardial ischemia, and thus generally failed to affect biomarkers  
492 of myocardial ischemia (Fig. 5 and Supplemental Fig. S6). Therefore, open-loop VNS may simply  
493 miss random myocardial ischemia events. We used an open-loop VNS paradigm representative of  
494 human cardiovascular studies, near the upper limit of clinically tolerable VNS levels (20% duty  
495 cycle at 2-2.5 mA; Anand et al., 2020; Table 1: Radcliffe et al., 2020). From a translational  
496 perspective, the closed-loop VNS paradigm used here should deliver significantly less VNS  
497 compared to open-loop VNS over time. For example, several clinical studies indicate that  
498 myocardial ischemia can occur for several minutes and up to ~1 hour per day (Pepine et al., 1994;  
499 Trimarco et al., 1990; Hinderliter et al., 1991). Therefore, to responsively mitigate myocardial



500 ischemia, closed-loop VNS may only be needed for ~1 hour a day or less. Over a 24-hour period,  
501 closed-loop VNS should also deliver ~1-2 orders of magnitude less VNS compared to open-loop  
502 VNS. The total charge delivery of VNS is important for future safety studies aiming to treat  
503 spontaneous myocardial ischemia with VNS. These results motivate future studies to optimize the  
504 total amount of stimulation delivered using responsive bioelectronic medicines, keeping in mind  
505 the desired safety and efficacy.

506

### 507 *AI Enabled Medicines: Opportunities and Challenges*

508

509 State-of-the-art machine learning methods provide powerful capabilities for pattern  
510 recognition that in many cases exceed the abilities of expert humans. The financial industry was  
511 an early adopter of neural network models for forecasting stock market index, energy demand, and  
512 real estate prices, prompted initially by a need to model nonlinear multivariate datasets (Huang et  
513 al., 2007; Wang et al., 2018). In medicine, the role of AI has been increasing steadily (Miller &  
514 Brown, 2018), especially in the field of Radiology where AI-enabled systems are used not only  
515 for detection and interpretation of images, but also scheduling and triage, clinical decision support  
516 systems, and several other critical steps of the Radiology workflow (Choy et al., 2018).

517 The uptake of AI-based solutions is driven by their capacity to ingest and comprehend vast  
518 quantities of data, permitting a more comprehensive assessment of a patient's condition. Included  
519 in this is the ability to detect dynamic features that are not apparent in the typical snapshot  
520 evaluations that are performed in the clinic (Romiti et al., 2020; e.g., blood pressure and heart rate  
521 at a single point in time). We leverage these capabilities of AI systems to dynamically detect and  
522 correct pathological cardiovascular events *in vivo* (Fig. 5 and Supplemental Fig. S6), similar to  
523 previous studies using responsive therapies for cardiovascular treatment (Kawada, T., &  
524 Sugimachi, 2009; Gotoh et al., 2005; Sugimachi, M., & Sunagawa, 2009; Sato et al., 2002).

525 Despite the clear benefits of AI-enabled technology solutions, trustworthiness is a major  
526 barrier to the adoption of AI-based diagnostics, and especially intervention. Some patients and  
527 physicians may be reluctant to allow a computer to make healthcare decisions. A recent survey of  
528 radiologists, information technology specialists, and industry representatives found that only 25%  
529 of the 123 people surveyed expressed confidence in results obtained by AI systems used in  
530 Radiology, and the vast majority (~91%) emphasized the need to validate the algorithms used in  
531 these systems (Jungmann et al., 2020). Strategies for building trust include the creation of  
532 'Explainable AI' that provides greater transparency and traceability, especially for systems that  
533 rely on deep learning architectures that are particularly opaque (Holzinger et al., 2019; Tjoa, E.,  
534 and Guan, 2020). Improved methods for data and model visualization may facilitate  
535 interpretability and explainability in medical AI systems (Vellido, 2019, 2012, & 2011; Liu et al.,  
536 2017), and were leveraged in the current study (via autoencoders, dimensionality reduction, and  
537 unsupervised clustering; Fig. 6 and 7). Importantly, building trust will likely be achieved gradually  
538 through an evolution of clinical trials that demonstrate with hard evidence the benefits of AI-based  
539 approaches in improving patient care.

540

541

542 **Supplemental Figures:**

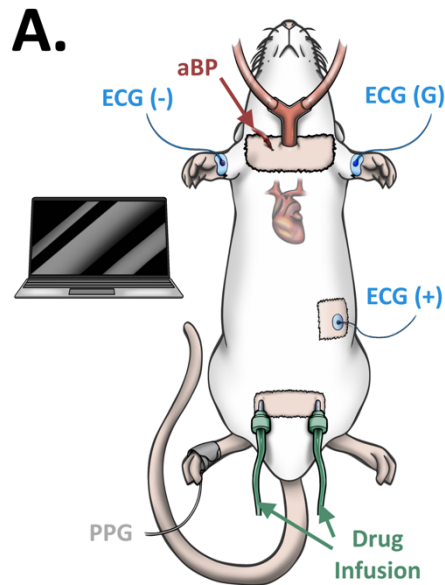

543 **Supplemental Figure S1. Cartoon Schematic of Experiment (related to Fig. 1, 2, & 3).** A. Cartoon schematic of  
544 the *in vivo* experiment and interfaces. All experiments were performed in isoflurane anesthetized rats (using  
545 tracheotomy, light red tube). We recorded arterial blood pressure from within the right carotid artery (aBP, red), a lead  
546 II electrocardiogram (ECG, blue patches; negative, positive, and ground electrodes noted), and a photoplethysmogram  
547 (right foot, black patch) during injections of cardiovascular stress and myocardial ischemia inducing agents into the  
548 femoral veins (catheters, green). All modules were synchronized and controlled electronically (laptop computer).

549

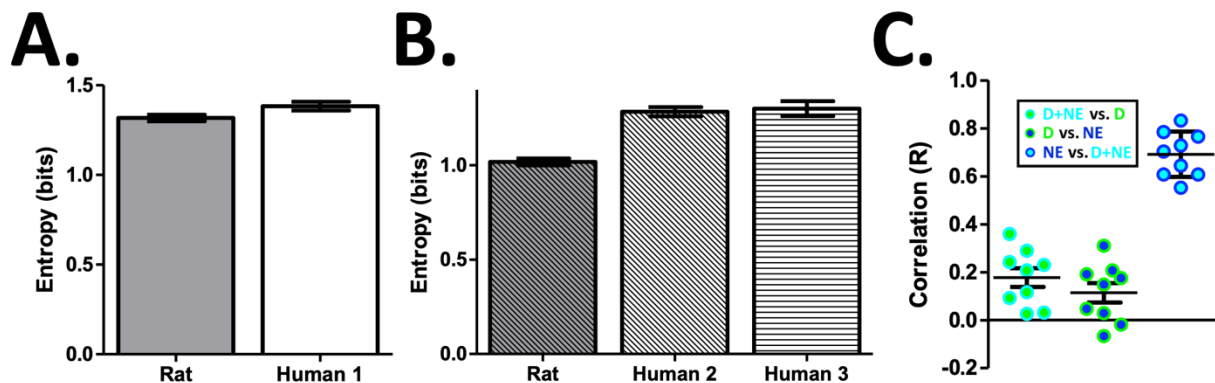

550 **Supplemental Figure S2. Cardiovascular Feature Data Exhibit Variability and State Overlap, Similar to**  
551 **Human Stress and Myocardial Ischemia (related to Fig. 3).** A & B. Cardiovascular feature data recorded from the  
552 rat ('Rat') demonstrated similar levels of variability and entropy compared to cardiovascular feature data recorded  
553 from human subjects in either the intensive care unit (A; including all 13 features, 'Human 1') or from human subjects  
554 during ambulatory myocardial ischemia (B; including only ECG features, #1 - #8, 'Human 2' and 'Human 3'). C.  
555 Cardiovascular feature data from the rat also exhibited significant stress state overlap, specifically between the NE  
556 and D+NE states. These results support the hypothesis that cardiovascular stress and myocardial ischemia induced by

557 D, NE, and D+NE injections induce variability and state overlap in the cardiovascular data, similar to human  
558 cardiovascular stress states. Data presented are mean  $\pm$  SEM.

559

560

561

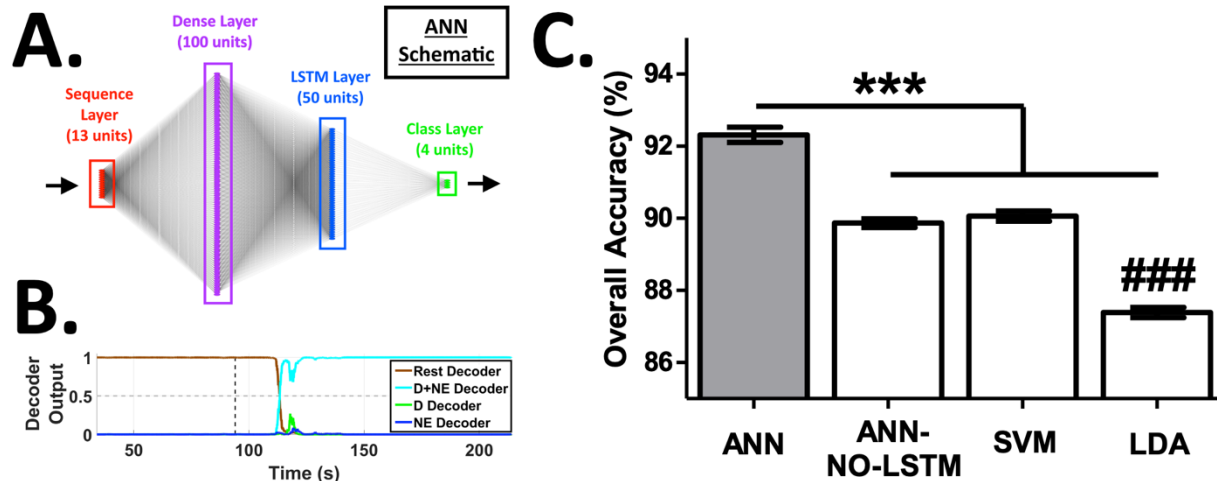

562 **Supplemental Figure S3. Artificial Neural Network (ANN) Architecture, ANN Decoder Outputs, and Superior**  
563 **Performance Compared to Other Classifiers (related to Fig. 4).** **A.** Cartoon schematic of the 4-layer ANN  
564 architecture (layers not to scale; red: sequence input layer, 13 units; purple: dense layer, 100 units; blue: LSTM layer,  
565 50 units; green: class output layer, 4 units). Please see the *Decoding Myocardial Demand Ischemia Using an Artificial*  
566 *Neural Network (ANN)* section of the methods for more details on the ANN. **B.** A given recording begins with a 90 s  
567 period of rest (i.e., no drug injected) followed by a 120 s period of the given injected agent. Feature creation and  
568 decoding began at 34 seconds to allow for the recording of sufficient baseline activity. Example ANN decoder outputs  
569 across the 4 classes during an injection of D+NE (a respective decoder output ranges from zero [low confidence in the  
570 respective class] to 1 [high confidence in the respective class]; gray dashed line = decoder significance threshold;  
571 black dashed line = injection start). **C.** The ANN outperformed an artificial neural network without an LSTM layer  
572 (ANN-NO-LSTM), a support vector machine (SVM), and a linear discriminant analysis (LDA) (\*\*\*) different at  
573  $p < 0.001$ ; ### different from ANN-NO-LSTM or SVM at  $p < 0.001$ ). These results demonstrate the superior  
574 performance of ANNs and the importance of leveraging time series dependencies for cardiovascular state decoding.  
575 Data presented are mean  $\pm$  SEM.

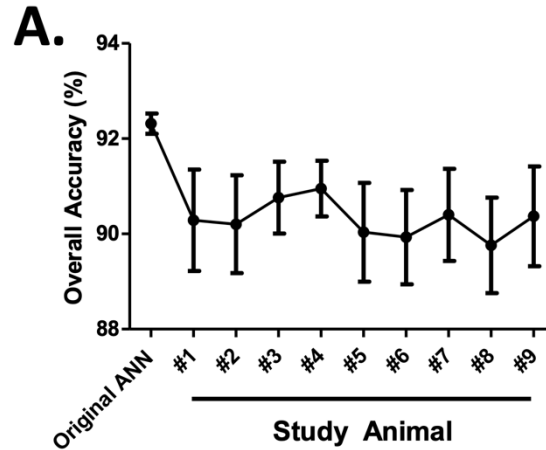

576 **Supplemental Figure S4. Fixed ANNs Demonstrate Significant Robustness and Generalization Out of Sample**  
577 **Across Time and Animals (related to Fig. 4).** A. Fixed ANNs were created to assess model generalization well out  
578 of sample to animals across the entire study. The original ANN performance level is shown as a reference (left,  
579 'Original ANN'), where the model was trained on data from the whole study and therefore all animals. The remaining  
580 performance levels are shown for separate 'fixed' ANNs. A fixed ANN was first trained on the base data set plus the  
581 given animal's data. The given fixed ANN was then challenged to predict on the remaining animals in the study  
582 (several weeks into the past or future), without any model updating. Although there was a decrease in accuracy and  
583 an increase in prediction variance, fixed ANNs still generalized well across time and even to other animals (chance  
584 level of prediction = ~25%). These results indicate that ANNs are robust and can generalize well out of sample. Data  
585 presented are mean  $\pm$  SEM.

586

587

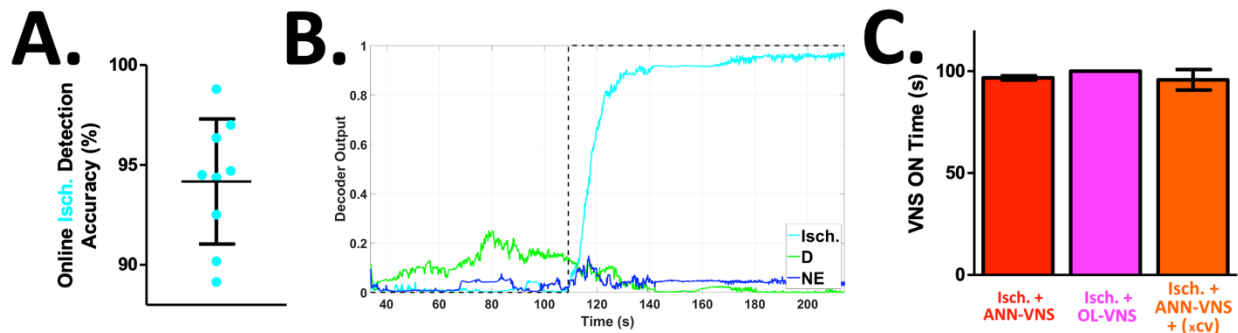

588 **Supplemental Figure S5. In vivo ANN Decoding Performance, Average ANN Decoder Outputs, and VNS**  
589 **Quantity Across Groups (related to Fig. 5).** A. The ANN performed *in vivo* online decoding of the target ischemic  
590 state (i.e., a D+NE injection) with an overall accuracy of ~94% (cyan points = overall accuracies from single animals).  
591 B. ANN decoder outputs for the 3 cardiovascular stress states averaged across all animals from the *in vivo* experiments  
592 (N = 9; black dashed line = labeled period for the given injection). C. All 3 VNS groups received the same quantity  
593 of VNS (red = Isch. + ANN-VNS; magenta = Isch. + OL-VNS; orange = Isch. + ANN-VNS + (xcv)). Data presented  
594 are mean  $\pm$  SEM.

595

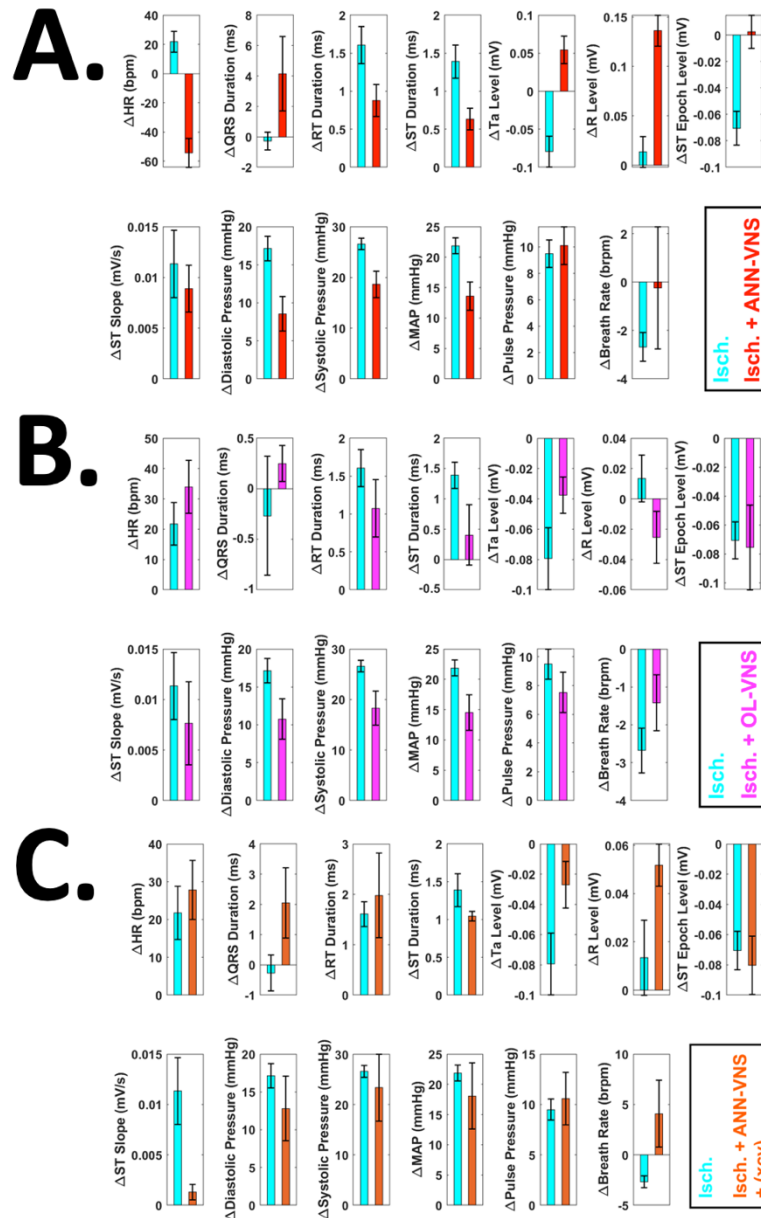

596 **Supplemental Figure S6. Effects Across All 13 Features Using Either Closed-loop VNS, Open-loop VNS, or**  
 597 **Closed-loop VNS Following a Vagotomy Caudal to the VNS site (related to Fig. 5).** A. All 13 features during  
 598 either D+NE ischemia alone (cyan, Isch.) or D+NE ischemia & closed-loop ANN-VNS (red, Isch. + ANN-VNS). We  
 599 performed 2 controls to appraise the mechanism of ANN-VNS. Both preprogrammed open-loop VNS (all features: B;  
 600 magenta, Isch. + OL-VNS) and ANN controlled VNS following a vagotomy caudal to the VNS site (all features: C;  
 601 orange, Isch. + ANN-VNS + (xcv)) essentially failed to significantly affect cardiovascular pathophysiology induced  
 602 by ischemia alone (cyan, Isch.). The results highlight the importance of both closed-loop VNS and vagal fibers  
 603 engaged for reversing myocardial ischemia pathophysiology. Data presented are mean  $\pm$  SEM.

604

605

606

607

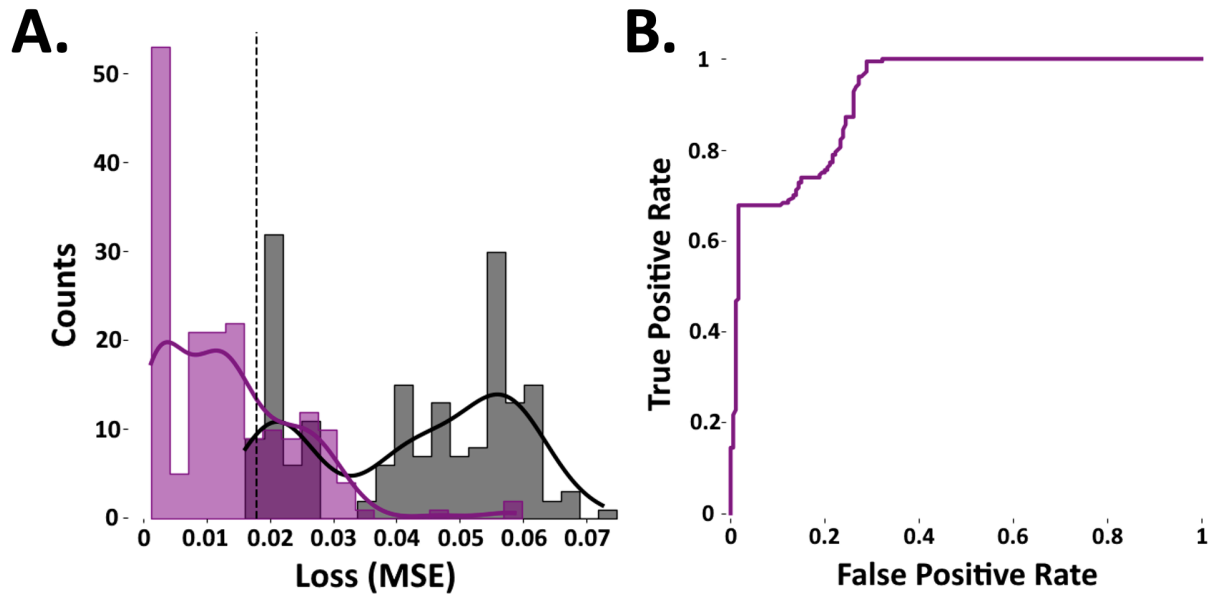

608  
 609 **Supplemental Figure S7. Emerging Cardiovascular Stress State Detection: Raw Mean Square Error (MSE)**  
 610 **Reconstruction Distributions for The LSTM Autoencoder (LSTM-AE) (related to Fig. 6).** Using the LSTM-AE,  
 611 emerging stress states were detected using a simple threshold method related to the reconstruction loss (i.e., mean  
 612 square error or MSE), similar to previous studies (Park et al., 2019). A high reconstruction loss is indicative of a new  
 613 emerging state that has never been seen by the LSTM-AE, and a low reconstruction loss indicates that the state is  
 614 known. The MSE loss distributions across all folds are shown for the LSTM-AE models for reconstruction of known  
 615 stress states (A, purple; i.e., D, NE, and D+NE), or new emerging stress states (A, gray; i.e., H-D, H-NE, and  
 616 H-D+NE). Colored curves (gaussian kernel fits) are shown on top of a given distribution (vertical dashed line = MSE  
 617 threshold for determining known and new emerging stress states, optimized for accuracy). B. Receiver operating  
 618 characteristic curve for the LSTM-AE technique, where true positive and false positive rates are plotted across a range  
 619 of MSE thresholds.

620

621

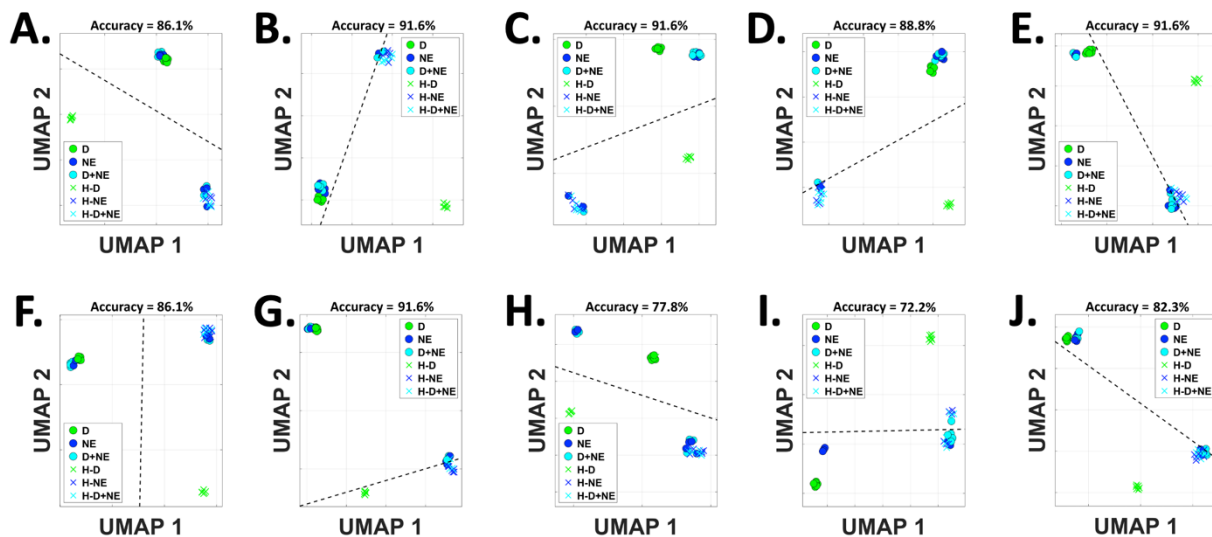

622 **Supplemental Figure S8. Known and Unknown Cardiovascular Stress States Within the 'Cardiovascular**  
 623 **Latent Space': Raw Data from All Folds (related to Fig. 7B).** We assessed 2-dimensional representations of all

624 known and unknown stress states within the ‘cardiovascular latent space’, leveraging the emerging state identification  
625 architecture (architecture schematic: Fig. 7A; known stress states: D, NE, and D+NE; unknown stress states: H-D, H-  
626 NE, and H-D+NE). Known and unknown stress states generally occupied mutually exclusive regions of the  
627 ‘cardiovascular latent space’ across all folds at ~85% accuracy (folds 1-10 = panels A – J, respectively; region  
628 boundary: black dashed line, determined using a linear support vector machine; separation accuracy shown above  
629 each plot). These results demonstrate the ability to robustly increase interpretability and accurately visualize known  
630 and new unknown emerging stress states.  
631

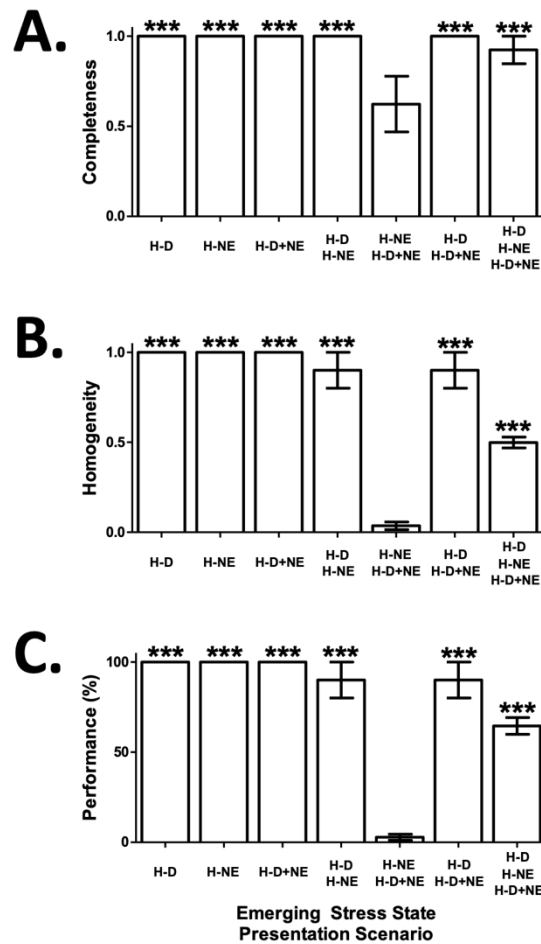

632 **Supplemental Figure S9. Emerging Cardiovascular Stress State Detection Performance Metrics Across All 7**  
633 **Presentation Scenarios (related to Fig. 7C).** We performed emerging stress state detection across the 7 emerging  
634 stress state presentation scenarios (x-axes), and present well studied correlates of unsupervised clustering performance  
635 (Rosenberg & Hirschberg, 2007) including completeness (A), homogeneity (B), and performance (V-measure \* 100%,  
636 C). Across metrics, almost all presentation scenarios performed well above chance performance levels (\*\*\*) = different  
637 from chance at  $p < 0.001$ ). Data presented are mean  $\pm$  SEM.

638  
639  
640  
641

642 **Acknowledgements:** We would like to thank our development and management teams at Battelle  
643 Memorial Institute, Russ Kittel for his contributions to the manuscript graphics, and several  
644 collaborators who contributed to the preparation and review of the manuscript. Financial support  
645 for this study came from Battelle Memorial Institute.

646  
647 **Author Contributions:** P.D.G., S.R.R., B.T., W.W.M., D.J.W., and R.L.H. conceived and  
648 designed the experiments. P.D.G., M.S.L., S.R.R., B.T., L.L., I.W.B., E.C.M., K.S.C., and A.R.  
649 performed the experiments and analysis. P.D.G., D.A.F., W.W.M., D.J.W., and R.L.H. provided  
650 project supervision. All authors contributed to writing and editing the manuscript.

651  
652 **Declaration of Interests:** The authors declare no competing interests.

653  
654

### 655 **STAR Methods:**

656

#### 657 **Overview:**

658 All procedures were approved by the Institutional Animal Care and Use Committee of  
659 QTest Labs (Columbus, OH). Adult male Sprague Dawley rats (~400-750 gm; N = 14) used in  
660 this study were housed one per cage (12 hr light/dark cycle; *ad libitum* access to food and water).  
661 The general aims of the study were to: 1) establish a model of myocardial ischemia, 2) utilize  
662 machine learning approaches to decode cardiovascular state changes, 3) determine if responsive  
663 closed-loop vagus nerve stimulation (VNS) controlled by an artificial neural network can  
664 significantly mitigate spontaneous myocardial ischemia, and 4) assess machine learning  
665 architectures for enhancing interpretability and facilitate detection of new emerging cardiovascular  
666 states. To acquire cardiovascular data, we recorded a lead II electrocardiogram (ECG), arterial  
667 blood pressure, and a photoplethysmogram (PPG) (schematic of experimental interfaces:  
668 Supplemental Fig. S1A). Analyses were performed in either MATLAB or Python.

669

#### 670 **Surgery & Interface Placement:**

671 Animals were first administered Carprofen (5 mg/kg, s.c. injection) and anesthetized using  
672 isoflurane, similar to previous studies assessing VNS effects on cardiovascular physiology  
673 (Plachta et al., 2013 & 2014). Isoflurane was vaporized into oxygen at 1.3-1.7%, and administered  
674 via a tracheotomy interface (Supplemental Fig. S1A, light red tube). Animals were kept supine  
675 throughout the procedure. Core body temperature was maintained at ~37° C using a heating  
676 platform placed under the animal (Vestavia Scientific; Birmingham, AL).

677 The following 6 interfaces were next placed (schematic: Supplemental Fig. S1A): catheters  
678 were placed within the 1) right and 2) left femoral veins for intravenous (i.v.) administration of  
679 dobutamine and / or norepinephrine (see **Inducing Myocardial Demand Ischemia Via Drug**  
680 **Injection** for more details on drug administration); 3) arterial blood pressure (aBP) was recorded  
681 within the right carotid artery using a solid state blood pressure catheter (2 french; SPR-407 Mikro-



682 Tip; Millar, Houston, Texas) and sent to a blood pressure amplifier (DA100C; BIOPAC, Goleta,  
683 CA); 4) a lead II electrocardiogram (ECG) was recorded using 3 hydrogel electrode contacts  
684 (ground: left arm, V+: right arm, V-: left leg) connected to an ECG amplifier (ECG100C;  
685 BIOPAC, Goleta, CA); 5) blood oxygen saturation level (SpO<sup>2</sup>) was recorded from the right  
686 hindpaw (OXY200; BIOPAC, Goleta, CA); 6) the left cervical vagus nerve was interfaced with a  
687 bipolar platinum iridium cuff electrode for delivering VNS, similar to our previous studies (Meyers  
688 et al., 2019; Ganzer et al., 2018). The bipolar VNS cuff electrode was tethered to a digitally  
689 controlled stimulator (Digitimer DS5; Hertfordshire, UK). Importantly, all instruments and  
690 stimulators were robustly electrically isolated to prevent stimulation artifact during cardiovascular  
691 data recordings.

692

### 693 **Vagus Nerve Stimulation (VNS) Cuff Implant:**

694 We interfaced with the left cervical vagus nerve to enable cardiovascular control, similar  
695 to several previous preclinical (Sachdeva et al., 2020; Plachta et al, 2013 & 2014; Yamakawa et  
696 al., 2014; Shinlapawittayatorn et al., 2013) and human studies (Lewis et al., 2001; Anand et al.,  
697 2020). VNS was delivered with the following stimulation parameters: biphasic square wave  
698 morphology, 2-2.5 mA, 300 micro-second pulse width, at 30 Hz. VNS was delivered during  
699 closed-loop or open-loop stimulation regimes (see **Modes of VNS Delivery** for more details).  
700 Importantly, these VNS parameters are similar to previous preclinical studies using VNS for  
701 cardiovascular control (Sachdeva et al., 2020; Plachta et al, 2013 & 2014; Yamakawa et al., 2014;  
702 Shinlapawittayatorn et al., 2013), and fall within clinically relevant stimulation ranges used in  
703 previous human trials using VNS for cardiovascular therapy (Anand et al., 2020; Table 1: Radcliffe  
704 et al., 2020).

705

### 706 **System Control for Signal Recording, Stimulation, and Injections:**

707 A schematic of the experiment and interfaces are shown in Supplemental Fig. S1A. All  
708 data was collected using a National Instruments USB-6259 data acquisition system (DAQ). The  
709 DAQ was controlled using MATLAB 2019a via a custom graphical user interface (The  
710 MathWorks; Natick, MA). We recorded 5 signals during the experiments: 1) the voltage sent to  
711 the VNS cuff electrodes, 2) the current drawn from the VNS cuff electrodes, 3) the lead II ECG  
712 waveform, 4) the aBP waveform, and 5) the SpO<sup>2</sup> signal. Signals #1 and #2 were only active during  
713 VNS events. We also enabled 3 outputs during the experiments, as needed: 1 & 2) triggers  
714 controlling the two drug injection pumps (KDS-200; Kent Scientific, Holliston, MA), and 3) a  
715 trigger controlling the VNS module. The DAQ operated at 10 kHz. This rate was needed to create  
716 VNS trains with the appropriate waveform morphology (e.g., biphasic square waves with the  
717 appropriate shape and resolution). Recorded signals were down-sampled and conditioned on-line  
718 as needed.

719

### 720 **Inducing Myocardial Ischemia Via Catecholamine Agent Injection:**

721 Cardiovascular stress and myocardial ischemia were induced using i.v. injection of  
722 dobutamine ( $\sim 2 \mu\text{g} \times \text{kg}^{-1} \times \text{min}^{-1}$ ) and / or norepinephrine ( $\sim 2 \mu\text{g} \times \text{kg}^{-1} \times \text{min}^{-1}$ ). Pilot studies were  
723 performed to assess dose dependent effects. These agents and similar dose rates have been used in  
724 several previous studies (Vimercati et al., 2012; Zhang & Mazgalev, 2009; Mandapaka & Hundley,  
725 2006; Berk et a., 1977; Heusch & Ross, 1991).

726

### 727 **On-Line Cardiovascular Signal Conditioning and Feature Extraction:**

728 A schematic of the feature extraction is shown in Fig. 2. The subcomponents of features  
729 were first extracted online via the following signal conditioning processes (occurring every 100  
730 ms): 1) a 10 kHz sampled epoch of the ECG and aBP waveforms were first down-sampled to 500  
731 Hz sampled waveforms; 2) for the ECG epoch (Fig. 2A), the R waves were first detected using the  
732 ‘Peak Prominence’ attribute of the ‘findpeaks’ function in MATLAB 2019a. Window based  
733 detection was then used to identify the P, Ta, S, and T wave correlates (Fig. 2A). The time and  
734 voltage level of the given ECG wave correlates were recorded; 3) for the given aBP epoch (Fig.  
735 2B), the systolic and diastolic pressure wave points were detected using the ‘Peak Prominence’  
736 attribute of the ‘findpeaks’ function in MATLAB 2019a. The mmHg values of the systolic and  
737 diastolic aBP levels were recorded; 4) inhalation and exhalation cycles were encoded into the low  
738 frequency components of the aBP waveform. The linear envelope of the aBP waveform was  
739 calculated to extract the respiratory cycles time series. Inhalation points (i.e., breaths) were  
740 detected and recorded using the ‘Peak Prominence’ attribute of the ‘findpeaks’ function in  
741 MATLAB 2019a.

742 The thirteen-element feature vector was finally constructed from the above ECG and aBP  
743 waveform attributes via the following calculations (again, occurring every 100 ms):

744

- 745 • Feature #1: Heart Rate (beats per minute, or bpm) = R-R interval (s) / 60 s
- 746 • Feature #2: QRS Duration (ms) = relative Q wave to S wave duration
- 747 • Feature #3: RT Duration (ms) = R wave to T wave duration
- 748 • Feature #4: ST Duration (ms) = S wave to T wave duration
- 749 • Feature #5: Ta Level (mV) = voltage level of the Ta wave + voltage level of the TP  
750 interval
- 751 • Feature #6: R Level (mV) = voltage level of the R wave + voltage level of the TP  
752 interval
- 753 • Feature #7: ST Epoch Level (mV) = voltage level of the S wave + voltage level of the  
754 TP interval
- 755 • Feature #8: ST Slope (mV / s) = (T wave level (mV) – S wave level (mV)) / (T wave  
756 time (s) – S wave time (s))
- 757 • Feature #9: Diastolic Pressure (mmHg) = minimum pressure level during diastole
- 758 • Feature #10: Systolic Pressure (mmHg) = maximum pressure level during systole
- 759 • Feature #11: Mean Arterial Pressure (mmHg) = (systolic pressure (mmHg) + diastolic  
760 pressure (mmHg)) / 2

- 761 • Feature #12: Pulse Pressure (mmHg) = systolic pressure (mmHg) – diastolic pressure  
762 (mmHg)  
763 • Feature #13: Breath Rate (breath rate per minute, or brpm) = breath count / 60 s  
764

765 This feature vector contains relatively simple features that enhance decoding interpretation,  
766 and can be extracted for decoding without the need for burdensome compute power. To smooth  
767 the data, the feature vector was calculated every 100 ms and averaged over a 4 s sliding window  
768 continuously during real-time recordings. The feature data was recorded for offline analysis and  
769 was also used for online decoding *in vivo* (see **Decoding Myocardial Demand Ischemia Using an**  
770 **Artificial Neural Network** for more details).

771  
772 **Decoding Myocardial Demand Ischemia Using an Artificial Neural Network (ANN):**

773 Overview: A schematic of the artificial neural network (ANN) architecture and decoder outputs  
774 are shown in Supplemental Fig. S3A & S3B. We employed an ANN architecture and a supervised  
775 learning approach to decode 4 different cardiovascular states (i.e., classes): 1) rest (i.e., no drug  
776 injected), 2) dobutamine injection (D), 3) norepinephrine injection (NE), and 4) a combined  
777 dobutamine and norepinephrine injection (D+NE). The decoder outputs were assessed both offline  
778 and online to evaluate algorithm performance. Online predictions were used to either validate the  
779 ANN model or control closed-loop VNS.

780 Recording Events and Data Labels: Each recording contained the following events in sequence:  
781 1) time 0 s = start of initial data streaming; 2) time 4 s = initiation of 4 s sliding window used for  
782 averaging features (sliding window increment per observation = 100 ms); 3) time 34 s = initiation  
783 of decoding (allows for 30 s of background feature data; this background feature data is used to  
784 both baseline subtract and standardize the subsequent recorded feature data); 4) time 94 s = start  
785 of a given injection; 5) time 214 s = end of injection, decoding, and recording.

786 To determine data labeling time points for supervised learning and ANN architecture  
787 attributes, we initially recorded pilot data from N=5 animals. On average, all 13 features  
788 statistically changed from baseline levels ~15 s after an injection is started (feature changes were  
789 averaged across all 3 injection types). Said differently, average physiological changes across  
790 injection types occurred at 109 s. Therefore, the ‘rest’ class label occurred from 4 – 109 s, and the  
791 given drug’s class label occurred during the injection period from 109 - 214 s. This labeling  
792 approach enabled both physiological motivated data labels, and balanced durations of rest and a  
793 given cardiovascular stress state during a given recording (for mitigating class imbalance).

794 Grid Search for ANN Architecture and Hyperparameters: We used a grid search to arrive at an  
795 ANN architecture and hyperparameters (schematic of the final ANN architecture: Supplemental  
796 Fig. S3A). The grid search leveraged the same pilot data that was used for creating data labels  
797 described above (again from N=5 animals; a total of data ~1.2 million points), and was performed  
798 on a computer with a graphical processing unit (NVIDIA GeForce GTX 1080; Santa Clara, CA).  
799 Overall accuracy (i.e., average accuracy across all classes) was used as the given algorithm’s

800 performance metric. Our preliminary analysis demonstrated best performance using 2 hidden  
801 layers (a dense layer followed by a long short-term memory (LSTM) layer).

802 We next assessed combinations of the following architecture and hyperparameter values:  
803 1) number of units in the dense layer (100, 250, or 500), 2) number of units in the LSTM layer  
804 (100, 250, or 500), 3) drop-out layer mask (between both the dense and LSTM and the LSTM and  
805 output layers; at 25%, 50%, or 75%), 4) mini-batch size (25%, 50%, or 75% of total data), and 6)  
806 early stopping criteria (reaching either 95% or 98% overall accuracy during training). The  
807 following were fixed during the grid search: sequence input layer size (13 units), output layer size  
808 (4 units), optimization algorithm (Adam), gradient decay metric (0.8), learning rate (0.01), gradient  
809 threshold (2), and L2 regularization metric (0.0005). The following ANN architecture and  
810 hyperparameters consistently performed the best, and were used throughout the study: architecture  
811 = sequence input layer (13 units), dense layer (250 units), drop-out layer mask (50%), LSTM layer  
812 (100 units), drop-out layer mask (25%), output layer (4 units); hyperparameters = mini-batch size  
813 (75%), early stopping (reaching 98% overall accuracy during training).

814

#### 815 Algorithm Performance Evaluation:

##### 816 **Online *In Vivo* Assessments (related to Fig. 5 and Supplemental Fig. S5):**

817 We performed online *in vivo* decoding of cardiovascular state and ANN controlled VNS in a total  
818 of N=9 animals. Overall, we modeled a clinical use case for the ANN. We continuously added to  
819 the base training set across experiments, and performed supervised updating of the ANN within a  
820 given animal for subsequent real-time prediction and closed-loop ANN-VNS control.  
821 Experimental design details: 1) the initial training set consisted of the pilot data; 2) each subsequent  
822 new animal then contributed 6 more recordings to the base training set (injection order  
823 randomized; 2 injections of D, 2 injections of NE, and 2 injections of D+NE); 3) for a given new  
824 animal, a new ANN model was trained and validated online *in vivo*; 4) online testing consisted of  
825 real time prediction during 3 injections of the target ischemic state (D+NE). We report overall  
826 accuracy for online *in vivo* ANN performance (Supplemental Fig. S5A).

827

##### 828 **Offline Assessments (related to Fig. 4, Supplemental Fig. S3, and Supplemental Fig. S4):**

829 We also assessed algorithm performance offline using the final data set (pilot data [N=5] +  
830 experimental data [N=9]). 10-fold cross validation was used to appraise the performance of the  
831 ANN and other types of classifiers for comparison (using 80% / 20% train / test splits,  
832 respectively). We compared the ANN performance to 3 other classifier types: 1) an ANN-NO-  
833 LSTM architecture (via replacing the LSTM layer with a second hidden dense layer); 2) a support  
834 vector machine (SVM); and 3) a linear discriminant analysis (LDA). Similar to the ANN, we  
835 performed a hyperparameter grid search to optimize the performance of both the SVM and LDA.  
836 We report overall accuracy for all classification approaches (Supplemental Fig. S3C).

837

##### 838 Modes of VNS Delivery (related to Fig. 5, Supplemental Fig. S5, and Supplemental Fig. S6):

839 We assessed the effects of ANN-VNS during episodes of spontaneous myocardial ischemia (i.e.,

840 ‘Isch.’ induced by D+NE). Supplemental Fig. S5B shows the average ANN decoder outputs during  
841 real-time predictions *in vivo* (decoder outputs averaged across all N=9 animals). Closed-loop VNS  
842 was triggered when the ‘Isch.’ decoder output score was greater than 0.5, representing a class  
843 probability greater than 50% (similar to our previous decoding and device activation studies:  
844 Ganzer et al., 2020; Bouton et al., 2016). Once triggered by the ANN, VNS remained active for  
845 the remainder of the injection (i.e., up until 214 s). Importantly, all instrumentation and stimulators  
846 were robustly isolated to prevent stimulation artifact during recordings.

847 ***Additional VNS Controls:*** We performed 2 VNS controls, complimenting ANN-VNS. The first  
848 VNS control condition was open-loop VNS (data presented in Fig. 5 and Supplemental Fig. S6B).  
849 We used a 20% VNS ON / 80% VNS OFF duty cycle for the open-loop VNS condition, to model  
850 preprogrammed open-loop VNS duty cycles used in clinical trials for cardiovascular treatments  
851 (Anand et al., 2020; Table 1: Radcliffe et al., 2020). Open-loop VNS recordings lasted a total of  
852 ~500 s, with 2-3 recording replicates within an animal (across N=5 animals). A D+NE injection  
853 was started at a randomized time during an open-loop VNS recording epoch, using the same 2 min  
854 injection duration.

855 The second VNS control condition was ANN-VNS following a vagotomy caudal to the  
856 cervical VNS site (data presented in Supplemental Fig. S6C). The vagus nerve was cut using  
857 surgical scissors and the cut ends were further separated by ~1 mm to ensure a complete vagotomy.  
858 Recording and VNS was resumed approximately 30 mins after the vagotomy to allow for  
859 physiological equilibration. We performed 3 recording replicates within an animal (across N=3  
860 animals).

861

862 ***Data Analyses for Assessing Cardiovascular Feature Changes (With or Without VNS):*** Several  
863 cardiovascular features shown throughout the manuscript are presented as a change from baseline  
864 (i.e.,  $\Delta$  relative to baseline). For the given feature, baseline activity from the first 30 s of a recording  
865 was used to create the baseline subtracted feature time series (see ***On-Line Cardiovascular Signal***  
866 ***Conditioning and Feature Extraction*** for details on feature creation). A given feature was further  
867 processed to assess effects as follows:

868 • ***Related to Fig. 1D:*** Rate-pressure product (RPP) across time was not a component of the  
869 overall 13-element feature vector, but was calculated similar to previous studies (Gobel et  
870 al., 1978):  $RPP = (\text{Heart Rate} \times \text{Systolic Blood pressure}) / 100$ .

871 • ***Related to Fig. 1G:*** Each point is a single animal’s recording for a given drug condition.  
872 For a given point, the  $\Delta$  ST epoch level or  $\Delta$  RPP value was its average during the entire  
873 injection period, relative to baseline. We report the Pearson’s correlation coefficient R.

874 • ***Related to Fig. 3:*** A given feature’s  $\Delta$  value was its average during the entire injection  
875 period, relative to baseline.

876 • ***Related to Supplemental Fig. S2A & S2B:*** We compared the variability (i.e., entropy) of  
877 cardiovascular changes for our preclinical rat data and human data collected in other  
878 studies. We used the following human cardiovascular data acquired from the physionet.org  
879 database (Goldberger et al., 2000): Supplemental Fig. S2A, ‘Human 1’ = recorded in the

880 intensive care unit (Kim et al., 2016); Supplemental Fig. S2B, ‘Human 2’ (Taddei et al.,  
881 1992) & ‘Human 3’ (Jager et al., 2003) = recorded during ambulatory episodes of  
882 myocardial ischemia. The cardiovascular feature matrices were next prepared using either  
883 all 13 features (Supplemental Fig. S2A) or only the 8 ECG features (Supplemental Fig.  
884 S2B). The feature matrices for the human data used a modified version of the rat feature  
885 extraction algorithm. Entropy was finally calculated and reported using the ‘entropy’  
886 function in MATLAB 2019a.

- 887 • **Related to Supplemental Fig. S2C:** We assessed the relationship between different pairs  
888 of drug states and report the Pearson’s correlation coefficient  $R$ . Within each animal ( $N=9$ ),  
889 we calculate the  $R$  values for all possible pairs of injections using the feature matrix across  
890 time (e.g., a D+NE & NE correlation). We plot each animal’s average  $R$  (single points in  
891 the figure) across the 3 different types of injection correlations.
- 892 • **Related to Fig. 5C, 5D, and Supplemental Fig. S6:** In Fig. 5D, we report two additional  
893 features:  $SpO_2$  = blood oxygen saturation value from the PPG monitor, and the QT / TQ  
894 ratio (related to arrhythmia probability; Fossa et al., 2017; relevant wave point correlates are  
895 shown in Fig. 2). Overall, for ‘Isch.’ a given feature’s  $\Delta$  value was its average during the  
896 entire injection period, relative to baseline. Overall, for ‘Isch. + ANN-VNS’, ‘Isch. + OL-  
897 VNS’, and ‘Isch. + ANN-VNS + (xcv)’ a given feature’s  $\Delta$  value was its average while  
898 VNS was on, relative to baseline.

899

900 **Detecting New Emerging Cardiovascular Stress States (related to Fig. 6 and Supplemental Fig.**  
901 **S7):** In a subset of animals ( $N=4$ ), we recorded the 13 features during injections at a higher dose  
902 rate ( $10 \mu\text{g} \times \text{kg}^{-1} \times \text{min}^{-1}$ ) across 3 injection types: ‘high dose dobutamine’ = H-D; ‘high dose  
903 norepinephrine’ = H-NE; ‘high dose dobutamine & norepinephrine combined’ = H-D+NE. These  
904 recordings at a  $\sim 5x$  higher dose rate presented a significantly different feature profile during a  
905 given injection (data not shown) and were used for subsequent emerging stress state detection. We  
906 appraised the ability of 3 techniques to detect these emerging stress states (emerging state / outlier  
907 detection technique review: Park, 2019): 1) LSTM autoencoder (LSTM-AE), 2) sparse  
908 autoencoder (Sparse-AE), and 3) isolation forest (Iso-Forest). Each technique was optimized using  
909 a grid search on a subset of the data (LSTM-AE major parameters: encoder layer (input) = 2730  
910 units, hidden layer = 256 units, decoder layer (output) = 2730 units, L2 regularization = 0; Sparse-  
911 AE major parameters: encoder layer (input) = 546 units, hidden layer = 50 units, decoder layer  
912 (output) = 546 units, L2 regularization = 0.1, sparsity proportion = 1; Iso-Forest major parameters:  
913  $N$  estimators = 2, max features = 140, outlier proportion = 0.16). We finally performed a 10-fold  
914 cross validation to appraise the performance of the 3 techniques (using 80% / 20% train / test splits,  
915 respectively). We report ‘emerging stress state detection sensitivity’ for the 3 techniques (Fig. 6;  
916 i.e., true positive rate when presented with a new emerging stress state, averaged across the 3 types  
917 of emerging stress states).

918

919 **Visualizing the ‘Cardiovascular Latent Space’ Using LSTM Autoencoders & UMAP (related to**  
920 **Fig. 7A, 7B, Supplemental Video 1, and Supplemental Fig. S8):** We used the hidden layer of the  
921 LSTM-AE combined with the dimensionality reduction method uniform manifold approximation  
922 and projection (or UMAP; McInnes & Healy, 2018) to visualize interpretable 2-dimensional  
923 representations of the emerging stress states (i.e., the ‘cardiovascular latent space’). The hidden  
924 layer of autoencoders and UMAP are both commonly used for generating latent features and  
925 dimensionality reduction (McConville et al., 2019). The hidden layer of the LSTM-AE (256  
926 elements) was labeled and passed into the UMAP algorithm for supervised dimensionality  
927 reduction (schematic of architecture: Fig. 7A; final UMAP hyperparameters: n\_neighbors = 15;  
928 min\_dist = 0.1; n\_components = 2). The ability to separate the 2-dimensional known and emerging  
929 stress state points in the ‘cardiovascular latent space’ was assessed using a linear SVM (related to  
930 Supplemental Fig. S8).

931  
932 **Identifying New Emerging Cardiovascular Stress State Types Using Unsupervised Clustering**  
933 **(related to Fig. 7C):** We performed unsupervised clustering of the 2-dimensional ‘cardiovascular  
934 latent space’ points using the hierarchical density based spatial clustering of applications with  
935 noise (HDBSCAN) method. HDBSCAN is a robust unsupervised clustering technique that deals  
936 well with diverse clustering scenarios. For a given stress state presentation scenario (combinations  
937 of 1, 2, or 3 emerging stress types), the unsupervised HDBSCAN method was first challenged to  
938 cluster the 2-dimensional ‘cardiovascular latent space’ points (i.e., determine the number of  
939 emerging stress states present). We next calculated clustering performance (V-measure \* 100%,  
940 Rosenberg & Hirschberg, 2007; V-measure is a well-studied metric for assessing clustering  
941 quality; 0 = completely random clustering, 1 = perfect clustering). In this implementation, V-  
942 measure based performance also quantifies correlates of several processes including the LSTM-  
943 AE’s ability to generate useful latent space vectors, the quality of the subsequent UMAP  
944 dimensionality reduction, and the quality of the final HDBSCAN method. We calculate and report  
945 performance (Fig. 7C) averaged across the 7 stress state presentation scenarios (H-D alone, H-NE  
946 alone, H-D+NE alone, H-D & H-NE, H-D & H-D+NE, H-NE & H-D+NE, and H-D & H-NE &  
947 H-D+NE).

948  
949 **Statistics:** Normality tests were performed for each analysis to determine if parametric or  
950 nonparametric statistics should be used. All statistical tests were two-tailed unless otherwise noted,  
951 and were performed in GraphPad Prism. An alpha level of 0.05 was accepted for significance,  
952 unless Bonferroni corrections are noted. Chance performance levels were generated by randomly  
953 permuting the true data labels 10 times, similar to previous studies (Ganzer et al., 2020; Ojala &  
954 Garriga, 2010).

955 We report the Pearson’s correlation coefficient R for data in panel Fig. 1G and  
956 Supplemental Fig. S2C. Effects of injections on the 13-element feature vector were evaluated using  
957 a separate one-way ANOVA for each feature (related Fig. 3). The factor was injection type with 3

958 levels: D, NE, and D+NE. Tukey's post-hoc test was used to determine differences for a given  
959 feature across injection types.

960 Differences in classification performance were evaluated using a one-way ANOVA  
961 (related Supplemental Fig. S3C). The factor was classifier type with 4 levels: ANN, ANN-NO-  
962 LSTM, SVM, and LDA. Tukey's post-hoc test was used to determine differences in performance  
963 across classifier types. A one-tailed independent samples t-test was used to determine if ANN  
964 performance values were above chance levels (related to Fig. 4D, confusion matrix). A Bonferroni  
965 corrected alpha value of 0.003 was used for significance (0.05 / 16 comparisons).

966 Differences in cardiovascular biomarkers were assessed using separate one-way ANOVAs  
967 for each main effect (related to Fig. 5C) and side effect (related to Fig. 5D). The factor was state  
968 type with 3 levels: Isch., Isch. + ANN-VNS, and Isch. + OL-VNS. Tukey's post-hoc test was used  
969 to determine differences across state types. VNS ON time was also assessed using a one-way  
970 ANOVA (related to Supplemental Fig. S5).

971 2-dimensional known and emerging stress state points in the 'cardiovascular latent space'  
972 were separated using a linear boundary (related to Supplemental Fig. S8), and differences between  
973 actual and chance performance were assessed using a t-test. Differences in emerging stress state  
974 detection performance were evaluated using a one-way ANOVA (related Fig. 6A). The factor was  
975 detection technique with 3 levels: LSTM-AE, Sparse-AE, and Iso-Forest. Tukey's post-hoc test  
976 was used to determine differences in performance across detection techniques. A receiver  
977 operating characteristic curve was generated for the LSTM-AE approach to present the raw MSE  
978 data (related to Supplemental Fig. S7). Lastly, we report the performance for unsupervised  
979 clustering and detection of different types of emerging stress states (related to Fig. 7C;  
980 performance = V-measure \* 100%; Rosenberg & Hirschberg, 2007). We assessed differences  
981 between actual and chance performance using a t-test (either averaged across the emerging stress  
982 state presentation scenarios = Fig. 7C; or assessed separately across the emerging stress state  
983 presentation scenarios = Supplemental Fig. S9).

984

## 985 **References:**

986

987 Global Health Estimates 2016: Deaths by Cause, Age, Sex, by Country and by Region, 2000-2016.  
988 Geneva, World Health Organization; 2018.

989 Ardehali, A., & Ports, T. A. (1990). Myocardial oxygen supply and demand. *Chest*, 98(3), 699-  
990 705.

991 Deedwania, P. C., & Carbajal, E. V. (1992). Role of myocardial oxygen demand in the  
992 pathogenesis of silent ischemia during daily life. *The American journal of cardiology*, 70(16), F19-  
993 F24.

994 Hinderliter, A., Miller, P., Bragdon, E., Ballenger, M., & Sheps, D. (1991). Myocardial ischemia  
995 during daily activities: the importance of increased myocardial oxygen demand. *Journal of the*  
996 *American College of Cardiology*, 18(2), 405-412.



- 997 Braun, M. M., Stevens, W. A., & Barstow, C. (2018). Stable coronary artery disease:  
998 treatment. *American family physician*, 97(6), 376-384.
- 999 Conti, C. R., Bavry, A. A., & Petersen, J. W. (2012). Silent ischemia: clinical relevance. *Journal*  
1000 *of the American College of Cardiology*, 59(5), 435-441.
- 1001 Cohn, P. F. (1998). Treatment of chronic myocardial ischemia: rationale and treatment  
1002 options. *Cardiovascular drugs and therapy*, 12(3), 217-223.
- 1003 Gutterman, D. D. (2009). Silent myocardial ischemia. *Circulation Journal*, 73(5), 785-797.
- 1004 Cecchi, A. C., Dovellini, E. V., Marchi, F., Pucci, P., Santoro, G. M., & Fazzini, P. F. (1983).  
1005 Silent myocardial ischemia during ambulatory electrocardiographic monitoring in patients with  
1006 effort angina. *Journal of the American College of Cardiology*, 1(3), 934-939.
- 1007 Rozanski A, Berman DS: Silent myocardial ischemia.I. Pathophysiology, frequency of  
1008 occurrence, and approaches toward detection. *Am Heart J* 114:615, 1987.
- 1009 Schwartz, B. G., Kloner, R. A., & Naghavi, M. (2018). Acute and subacute triggers of  
1010 cardiovascular events. *The American journal of cardiology*, 122(12), 2157-2165.
- 1011 Capilupi, M. J., Kerath, S. M., & Becker, L. B. (2020). Vagus nerve stimulation and the  
1012 cardiovascular system. *Cold Spring Harbor Perspectives in Medicine*, 10(2), a034173.
- 1013 Levy MN, Schwartz PJ, eds. *Vagal Control of the Heart: Experimental Basis and Clinical*  
1014 *Implications*. Armonk, NY: Futura Publishing Co; 1994:644
- 1015 Ardell, J. L., Rajendran, P. S., Nier, H. A., KenKnight, B. H., & Armour, J. A. (2015). Central-  
1016 peripheral neural network interactions evoked by vagus nerve stimulation: functional  
1017 consequences on control of cardiac function. *American Journal of Physiology-Heart and*  
1018 *Circulatory Physiology*, 309(10), H1740-H1752.
- 1019 Buck, J. D., Warltier, D. C., Hardman, H. F., & Gross, G. J. (1981). Effects of sotalol and vagal  
1020 stimulation on ischemic myocardial blood flow distribution in the canine heart. *Journal of*  
1021 *Pharmacology and Experimental Therapeutics*, 216(2), 347-351.
- 1022 Patel, D. J., Mulcahy, D., Norrie, J., Wright, C., Clarke, D., Ford, I., & Fox, K. M. (1996). Natural  
1023 variability of transient myocardial ischaemia during daily life: an obstacle when assessing efficacy  
1024 of anti-ischaemic agents?. *Heart*, 76(6), 477-482.
- 1025 Celermajer, D. S., Spiegelhalter, D. J., Deanfield, M., & Deanfield, J. E. (1994). Variability of  
1026 episodic ST segment depression in chronic stable angina: implications for individual and group  
1027 trials of therapeutic efficacy. *Journal of the American College of Cardiology*, 23(1), 66-73.
- 1028 Deanfield, J. E., & Spiegelhalter, D. (1990). Variability of myocardial ischemia: implications for  
1029 monitoring strategies. In *Silent Myocardial Ischemia: A Critical Appraisal* (Vol. 37, pp. 176-186).  
1030 Karger Publishers.
- 1031 Tzivoni, D., Gavish, A., Benhorin, J., Banai, S., Keren, A., & Stern, S. (1987). Day-to-day  
1032 variability of myocardial ischemic episodes in coronary artery disease. *The American journal of*  
1033 *cardiology*, 60(13), 1003-1005.

- 1034 Michaelides, A. P., Liakos, C. I., Antoniadis, C., Tsiachris, D. L., Soulis, D., Dilaveris, P. E., ...  
1035 & Stefanadis, C. I. (2010). ST-segment depression in hyperventilation indicates a false positive  
1036 exercise test in patients with mitral valve prolapse. *Cardiology research and practice*, 2010.
- 1037 Petrov, D. B., Sardovski, S. I., & Milanova, M. H. (2012). Severe hypokalemia masquerading  
1038 myocardial ischemia. *Cardiology Research*, 3(5), 236.
- 1039 Sapin, P. M., Koch, G., Blauwet, M. B., McCarthy, J. J., Hinds, S. W., & Gettes, L. S. (1991).  
1040 Identification of false positive exercise tests with use of electrocardiographic criteria: a possible  
1041 role for atrial repolarization waves. *Journal of the American College of Cardiology*, 18(1), 127-  
1042 135.
- 1043 Wright, J., Macefield, V. G., van Schaik, A., & Tapson, J. C. (2016). A review of control strategies  
1044 in closed-loop neuroprosthetic systems. *Frontiers in neuroscience*, 10, 312.
- 1045 Sun, F. T., & Morrell, M. J. (2014). Closed-loop neurostimulation: the clinical  
1046 experience. *Neurotherapeutics*, 11(3), 553-563.
- 1047 Hays SA (2016) Enhancing rehabilitative therapies with vagus nerve stimulation.  
1048 *Neurotherapeutics* 13:382-394.
- 1049 Ganzer PD, Darrow MJ, Meyers EC, Solorzano BR, Ruiz AD, Robertson NM, Adcock KS, James  
1050 JT, Jeong HS, Becker AM, Goldberg MP, Pruitt DT, Hays SA, Kilgard MP, Rennaker RL 2nd  
1051 (2018) Closed-loop neuromodulation restores network connectivity and motor control after spinal  
1052 cord injury. *Elife* 7:e32058.
- 1053 Ganzer, P. D., & Sharma, G. (2019). Opportunities and challenges for developing closed-loop  
1054 bioelectronic medicines. *Neural Regeneration Research*, 14(1), 46.
- 1055 Vellido, A. (2019). The importance of interpretability and visualization in machine learning for  
1056 applications in medicine and health care. *Neural Computing and Applications*, 1-15.
- 1057 Tonekaboni, S., Joshi, S., McCradden, M. D., & Goldenberg, A. (2019). What clinicians want:  
1058 contextualizing explainable machine learning for clinical end use. *arXiv preprint*  
1059 *arXiv:1905.05134*.
- 1060
- 1061 Tjoa, E., & Guan, C. (2019). A survey on explainable artificial intelligence (XAI): towards medical  
1062 XAI. *arXiv preprint arXiv:1907.07374*.
- 1063
- 1064 Liu S, Wang X, Liu M, Zhu J (2017) Towards better analysis of machine learning models: a visual  
1065 analytics perspective. *Vis Inf* 1(1):48–56.
- 1066
- 1067 Vellido, A., Martín-Guerrero, J. D., & Lisboa, P. J. (2012). Making machine learning models  
1068 interpretable. In *ESANN* (Vol. 12, pp. 163-172).
- 1069 Vellido Alcacena, A., Martín, J. D., Rossi, F., & Lisboa, P. J. (2011). Seeing is believing: The  
1070 importance of visualization in real-world machine learning applications. In *Proceedings: 19th*  
1071 *European Symposium on Artificial Neural Networks, Computational Intelligence and Machine*  
1072 *Learning, ESANN 2011: Bruges, Belgium, April 27-28-29, 2011* (pp. 219-226).

- 1073 Zahavy, T., Ben-Zrihem, N., & Mannor, S. (2016, June). Graying the black box: Understanding  
1074 dqns. In *International Conference on Machine Learning* (pp. 1899-1908).
- 1075 Epel, E. S., Crosswell, A. D., Mayer, S. E., Prather, A. A., Slavich, G. M., Puterman, E., & Mendes,  
1076 W. B. (2018). More than a feeling: A unified view of stress measurement for population  
1077 science. *Frontiers in neuroendocrinology*, 49, 146-169.
- 1078 Rocco MB, Nabel EG, Selwyn AP. Development and validation of ambulatory monitoring to  
1079 characterize ischemic heart disease out of hospital. *Cardiology Clinics* 1986; 4: 659 – 668.
- 1080 Rehman, A., Zalos, G., Andrews, N. P., Mulcahy, D., & Quyyumi, A. A. (1997). Blood pressure  
1081 changes during transient myocardial ischemia: insights into mechanisms. *Journal of the American*  
1082 *College of Cardiology*, 30(5), 1249-1255.
- 1083 Deedwania, P. C., & Nelson, J. R. (1990). Pathophysiology of silent myocardial ischemia during  
1084 daily life. Hemodynamic evaluation by simultaneous electrocardiographic and blood pressure  
1085 monitoring. *Circulation*, 82(4), 1296-1304.
- 1086 Mandapaka, S., & Hundley, W. G. (2006). Dobutamine cardiovascular magnetic resonance: a  
1087 review. *Journal of Magnetic Resonance Imaging: An Official Journal of the International Society*  
1088 *for Magnetic Resonance in Medicine*, 24(3), 499-512.
- 1089 Heusch G & Ross J (ed.) (1991) Adrenergic mechanisms in myocardial ischemia. Darmstadt :  
1090 Steinkopff; New York: Springer.
- 1091 Kawada, T., Yamazaki, T., Akiyama, T., Mori, H., Inagaki, M., Shishido, T., ... & Sunagawa, K.  
1092 (2002). Effects of brief ischaemia on myocardial acetylcholine and noradrenaline levels in  
1093 anaesthetized cats. *Autonomic Neuroscience*, 95(1-2), 37-42.
- 1094 Barger, A. C., Herd, J. A., & Liebowitz, M. R. (1961). Chronic Catheterization of Coronary Artery:  
1095 Induction of ECG Pattern of Myocardial Ischemia by Intracoronary Epinephrine. *Proceedings of*  
1096 *the Society for Experimental Biology and Medicine*, 107(3), 474-477.
- 1097 Lepeschkin, E., Marchet, H., Schroeder, G., Wagner, R., e Silva, P. D. P., & Raab, W. (1960).  
1098 Effect of epinephrine and norepinephrine on the electrocardiogram of 100 normal subjects\*. *The*  
1099 *American Journal of Cardiology*, 5(5), 594-603.
- 1100 Segar, D. S., Ryan, T., Sawada, S. G., Johnson, M., & Feigenbaum, H. (1995). Pharmacologically  
1101 induced myocardial ischemia: a comparison of dobutamine and dipyridamole. *Journal of the*  
1102 *American Society of Echocardiography*, 8(1), 9-14.
- 1103 Detry, J. M. R., Piette, F., & Brasseur, L. A. (1970). Hemodynamic determinants of exercise ST-  
1104 segment depression in coronary patients. *Circulation*, 42(4), 593-599.
- 1105 Gobel, F. L., Norstrom, L. A., Nelson, R. R., Jorgensen, C. R., & Wang, Y. (1978). The rate-  
1106 pressure product as an index of myocardial oxygen consumption during exercise in patients with  
1107 angina pectoris. *Circulation*, 57(3), 549-556.
- 1108 Klabunde, R. E. (2017). Cardiac electrophysiology: normal and ischemic ionic currents and the  
1109 ECG. *Advances in physiology education*, 41(1), 29-37.
- 1110 Janse, M. J. (2007). ST-segment elevation or TQ-segment depression?. *Heart rhythm*, 4(2), 207.

- 1111 Kléber, A. G., Janse, M. J., Van Capelle, F. J., & Durrer, D. I. R. K. (1978). Mechanism and time  
1112 course of ST and TQ segment changes during acute regional myocardial ischemia in the pig heart  
1113 determined by extracellular and intracellular recordings. *Circulation Research*, *42*(5), 603-613.
- 1114 Cinca, J., Janse, M. J., Moréna, H., Candell, J., Valle, V., & Durrer, D. (1980). Mechanism and  
1115 time course of the early electrical changes during acute coronary artery occlusion: an attempt to  
1116 correlate the early ECG changes in man to the cellular electrophysiology in the pig. *Chest*, *77*(4),  
1117 499-505.
- 1118 Sharma, N., & Gedeon, T. (2012). Objective measures, sensors and computational techniques for  
1119 stress recognition and classification: A survey. *Computer methods and programs in*  
1120 *biomedicine*, *108*(3), 1287-1301.
- 1121 Goldberger, A. L., Amaral, L. A., Glass, L., Hausdorff, J. M., Ivanov, P. C., Mark, R. G., ... &  
1122 Stanley, H. E. (2000). PhysioBank, PhysioToolkit, and PhysioNet: components of a new research  
1123 resource for complex physiologic signals. *circulation*, *101*(23), e215-e220.
- 1124 Kim, N., Krasner, A., Kosinski, C., Wininger, M., Qadri, M., Kappus, Z., ... & Craelius, W. (2016).  
1125 Trending autoregulatory indices during treatment for traumatic brain injury. *Journal of clinical*  
1126 *monitoring and computing*, *30*(6), 821-831.
- 1127 Taddei, A., Distanto, G., Emdin, M., Pisani, P., Moody, G. B., Zeelenberg, C., & Marchesi, C.  
1128 (1992). The European ST-T database: standard for evaluating systems for the analysis of ST-T  
1129 changes in ambulatory electrocardiography. *European heart journal*, *13*(9), 1164-1172.
- 1130 Jager, F., Taddei, A., Moody, G. B., Emdin, M., Antolič, G., Dorn, R., ... & Mark, R. G. (2003).  
1131 Long-term ST database: a reference for the development and evaluation of automated ischaemia  
1132 detectors and for the study of the dynamics of myocardial ischaemia. *Medical and Biological*  
1133 *Engineering and Computing*, *41*(2), 172-182.
- 1134 Murat, F., Yildirim, O., Talo, M., Baloglu, U. B., Demir, Y., & Acharya, U. R. (2020). Application  
1135 of deep learning techniques for heartbeats detection using ECG signals-analysis and  
1136 review. *Computers in Biology and Medicine*, 103726.
- 1137 Gers, F. A., Schmidhuber, J., & Cummins, F. (1999). Learning to forget: Continual prediction with  
1138 LSTM.
- 1139 Svensson, P., Niklasson, U., & Östergren, J. (2001). Episodes of ST-segment depression is related  
1140 to changes in ambulatory blood pressure and heart rate in intermittent claudication. *Journal of*  
1141 *internal medicine*, *250*(5), 398-405.
- 1142 Fossa, A. A. (2017). Beat-to-beat ECG restitution: A review and proposal for a new biomarker to  
1143 assess cardiac stress and ventricular tachyarrhythmia vulnerability. *Annals of Noninvasive*  
1144 *Electrocardiology*, *22*(5), e12460.
- 1145 Anand, I. S., Konstam, M. A., Klein, H. U., Mann, D. L., Ardell, J. L., Gregory, D. D., ... & Butler,  
1146 J. (2020). Comparison of symptomatic and functional responses to vagus nerve stimulation in  
1147 ANTHEM-HF, INOVATE-HF, and NECTAR-HF. *ESC heart failure*, *7*(1), 76-84.
- 1148 Radcliffe, E. J., Pearman, C. M., Watkins, A., Lawless, M., Kirkwood, G. J., Saxton, S. N., ... &  
1149 Trafford, A. W. (2020). Chronic vagal nerve stimulation has no effect on tachycardia-induced heart  
1150 failure progression or excitation–contraction coupling. *Physiological Reports*, *8*(2).

- 1151 Park, C. H. (2019). Outlier and anomaly pattern detection on data streams. *The Journal of*  
1152 *Supercomputing*, 75(9), 6118-6128.
- 1153 McInnes, L., Healy, J., & Melville, J. (2018). Umap: Uniform manifold approximation and  
1154 projection for dimension reduction. *arXiv preprint arXiv:1802.03426*.
- 1155 McConville, R., Santos-Rodriguez, R., Piechocki, R. J., & Craddock, I. (2019). N2d:(not too) deep  
1156 clustering via clustering the local manifold of an autoencoded embedding. *arXiv preprint*  
1157 *arXiv:1908.05968*.
- 1158 Campello R.J.G.B., Moulavi D., Sander J. (2013) Density-Based Clustering Based on  
1159 Hierarchical Density Estimates. In: Pei J., Tseng V.S., Cao L., Motoda H., Xu G. (eds)  
1160 Advances in Knowledge Discovery and Data Mining. PAKDD 2013. Lecture Notes in  
1161 Computer Science, vol 7819. Springer, Berlin, Heidelberg. [https://doi.org/10.1007/978-3-642-](https://doi.org/10.1007/978-3-642-37456-2_14)  
1162 [37456-2\\_14](https://doi.org/10.1007/978-3-642-37456-2_14)
- 1163 Rosenberg, A., & Hirschberg, J. (2007). V-measure: A conditional entropy-based external cluster  
1164 evaluation measure. In *Proceedings of the 2007 joint conference on empirical methods in natural*  
1165 *language processing and computational natural language learning (EMNLP-CoNLL)* (pp. 410-  
1166 420).
- 1167 Malliani A (1986). The elusive link between transient myocardial ischemia and  
1168 pain. *Circulation*, 73(2), 201-204.
- 1169 Soliman, E. Z. (2019). Silent myocardial infarction and risk of heart failure: current evidence and  
1170 gaps in knowledge. *Trends in cardiovascular medicine*, 29(4), 239-244.
- 1171 Ding, K., & Kullo, I. J. (2009). Evolutionary genetics of coronary heart disease.  
1172 *Circulation*, 119(3), 459-467.
- 1173 Kember, G., Armour, J. A., & Zamir, M. (2013). Neural control hierarchy of the heart has not  
1174 evolved to deal with myocardial ischemia. *Physiological genomics*, 45(15), 638-644.
- 1175 Swap, C. J., & Nagurney, J. T. (2005). Value and limitations of chest pain history in the evaluation  
1176 of patients with suspected acute coronary syndromes. *Jama*, 294(20), 2623-2629.
- 1177 Pomblum, V. J., Korbmacher, B., Cleveland, S., Sunderdiek, U., Klocke, R. C., & Schipke, J. D.  
1178 (2010). Cardiac stunning in the clinic: the full picture. *Interactive cardiovascular and thoracic*  
1179 *surgery*, 10(1), 86-91.
- 1180 Tabibiazar, R., & Edelman, S. V. (2003). Silent ischemia in people with diabetes: a condition that  
1181 must be heard. *Clinical Diabetes*, 21(1), 5-9.
- 1182 Pop-Busui, R. (2010). Cardiac autonomic neuropathy in diabetes: a clinical perspective. *Diabetes*  
1183 *care*, 33(2), 434-441.
- 1184 Hassabis, D., Kumaran, D., Summerfield, C., & Botvinick, M. (2017). Neuroscience-inspired  
1185 artificial intelligence. *Neuron*, 95(2), 245-258.
- 1186 Marblestone, A. H., Wayne, G., & Kording, K. P. (2016). Toward an integration of deep learning  
1187 and neuroscience. *Frontiers in computational neuroscience*, 10, 94.

- 1188 Wilson, H. J., & Daugherty, P. R. (2018). Collaborative intelligence: humans and AI are joining  
1189 forces. *Harvard Business Review*, 96(4), 114-123.
- 1190 Jarrahi, M. H. (2018). Artificial intelligence and the future of work: Human-AI symbiosis in  
1191 organizational decision making. *Business Horizons*, 61(4), 577-586.
- 1192 Lotze, U., Özbek, C., Gerk, U., Kaufmann, H., Sen, S., & Figulla, H. R. (1999). Three-year follow-  
1193 up of patients with silent ischemia in the subacute phase of myocardial infarction after  
1194 thrombolysis and early coronary intervention. *International journal of cardiology*, 71(2), 167-178.
- 1195 Deedwania, P. C., & Carbajal, E. V. (1990). Silent ischemia during daily life is an independent  
1196 predictor of mortality in stable angina. *Circulation*, 81(3), 748-756.
- 1197 Balla, C., Pavasini, R., & Ferrari, R. (2018). Treatment of angina: where are  
1198 we?. *Cardiology*, 140(1), 52-67.
- 1199 Vitale, F., & Litt, B. (2018). Bioelectronics: the promise of leveraging the body's circuitry to treat  
1200 disease.
- 1201 Birmingham K, Gradinaru V, Anikeeva P, Grill WM, Pikov V, McLaughlin B, Pasricha P, Weber  
1202 D, Ludwig K, Famm K (2014) Bioelectronic medicines: a research roadmap. *Nat Rev Drug Discov*  
1203 13:399-400.
- 1204 Machhada, A., Hosford, P. S., Dyson, A., Ackland, G. L., Mastitskaya, S., & Gourine, A. V.  
1205 (2020). Optogenetic Stimulation of Vagal Efferent Activity Preserves Left Ventricular Function  
1206 in Experimental Heart Failure. *JACC: Basic to Translational Science*.
- 1207 Nuntaphum, W., Pongkan, W., Wongjaikam, S., Thummasorn, S., Tanajak, P., Khamseekaew, J.,  
1208 ... & Shinlapawittayatorn, K. (2018). Vagus nerve stimulation exerts cardioprotection against  
1209 myocardial ischemia/reperfusion injury predominantly through its efferent vagal fibers. *Basic*  
1210 *research in cardiology*, 113(4), 22.
- 1211 Del Rio, C. L., Dawson, T. A., Clymer, B. D., Paterson, D. J., & Billman, G. E. (2008). Effects of  
1212 acute vagal nerve stimulation on the early passive electrical changes induced by myocardial  
1213 ischaemia in dogs: heart rate-mediated attenuation. *Experimental physiology*, 93(8), 931-944.
- 1214 Vanoli, E., De Ferrari, G. M., Stramba-Badiale, M., Hull Jr, S. S., Foreman, R. D., & Schwartz, P.  
1215 J. (1991). Vagal stimulation and prevention of sudden death in conscious dogs with a healed  
1216 myocardial infarction. *Circulation research*, 68(5), 1471-1481.
- 1217 MYERS, R. W., PEARLMAN, A. S., HYMAN, R. M., GOLDSTEIN, R. A., KENT, K. M.,  
1218 GOLDSTEIN, R. E., & EPSTEIN, S. E. (1974). Beneficial effects of vagal stimulation and  
1219 bradycardia during experimental acute myocardial ischemia. *Circulation*, 49(5), 943-947.
- 1220 Pepine, C. J., Geller, N. L., Knatterud, G. L., Bourassa, M. G., Chaitman, B. R., Davies, R. F., ...  
1221 & Mueller, H. (1994). The Asymptomatic Cardiac Ischemia Pilot (ACIP) study: design of a  
1222 randomized clinical trial, baseline data and implications for a long-term outcome trial. *Journal of*  
1223 *the American College of Cardiology*, 24(1), 1-10.
- 1224 Trimarco, B., Chierchia, S., Lembo, G., De Luca, N., Ricciardelli, B., Condorelli, G., ... &  
1225 Condorelli, M. (1990). Prolonged duration of myocardial ischemia in patients with coronary heart  
1226 disease and impaired cardiopulmonary baroreceptor sensitivity. *Circulation*, 81(6), 1792-1802.

- 1227 Huang, W., Lai, K. K., Nakamori, Y., Wang, S., and Yu, L., 2007, “Neural Networks in Finance  
1228 and Economics Forecasting,” *Int. J. Info. Tech. Dec. Mak.*, 06(01), pp. 113–140.
- 1229 Wang, M., Zhao, L., Du, R., Wang, C., Chen, L., Tian, L., and Eugene Stanley, H., 2018, “A Novel  
1230 Hybrid Method of Forecasting Crude Oil Prices Using Complex Network Science and Artificial  
1231 Intelligence Algorithms,” *Applied Energy*, 220, pp. 480–495.
- 1232 Miller, D. D., and Brown, E. W., 2018, “Artificial Intelligence in Medical Practice: The Question  
1233 to the Answer?,” *The American Journal of Medicine*, 131(2), pp. 129–133.
- 1234 Choy, G., Khalilzadeh, O., Michalski, M., Do, S., Samir, A. E., Pianykh, O. S., Geis, J. R.,  
1235 Pandharipande, P. V., Brink, J. A., and Dreyer, K. J., 2018, “Current Applications and Future  
1236 Impact of Machine Learning in Radiology,” *Radiology*, 288(2), pp. 318–328.
- 1237 Romiti, S., Vinciguerra, M., Saade, W., Anso Cortajarena, I., & Greco, E. (2020). Artificial  
1238 Intelligence (AI) and Cardiovascular Diseases: An Unexpected Alliance. *Cardiology Research  
1239 and Practice*, 2020.
- 1240 Kawada, T., & Sugimachi, M. (2009). Artificial neural interfaces for bionic cardiovascular  
1241 treatments. *Journal of Artificial Organs*, 12(1), 17-22.
- 1242 Gotoh, T. M., Tanaka, K., & Morita, H. (2005). Controlling arterial blood pressure using a  
1243 computer–brain interface. *Neuroreport*, 16(4), 343-347.
- 1244 Sugimachi, M., & Sunagawa, K. (2009). Bionic cardiology: Exploration into a wealth of  
1245 controllable body parts in the cardiovascular system. *IEEE reviews in biomedical engineering*, 2,  
1246 172-186.
- 1247 Sato, T., Kawada, T., Sugimachi, M., & Sunagawa, K. (2002). Bionic technology revitalizes native  
1248 baroreflex function in rats with baroreflex failure. *Circulation*, 106(6), 730-734.
- 1249 Jungmann, F., Jorg, T., Hahn, F., Pinto dos Santos, D., Jungmann, S. M., Düber, C., Mildenerger,  
1250 P., and Kloeckner, R., 2020, “Attitudes Toward Artificial Intelligence Among Radiologists, IT  
1251 Specialists, and Industry,” *Academic Radiology*.
- 1252 Holzinger, A., Langs, G., Denk, H., Zatloukal, K., and Müller, H., 2019, “Causability and  
1253 Explainability of Artificial Intelligence in Medicine,” *WIREs Data Mining and Knowledge  
1254 Discovery*, 9(4), p. e1312.
- 1255 Plachta, D. T., Gierthmuehlen, M., Cota, O., Boeser, F., & Stieglitz, T. (2013). BaroLoop: Using  
1256 a multichannel cuff electrode and selective stimulation to reduce blood pressure. In *2013 35th  
1257 Annual International Conference of the IEEE Engineering in Medicine and Biology Society  
1258 (EMBC)* (pp. 755-758). IEEE.
- 1259 Plachta, D. T., Gierthmuehlen, M., Cota, O., Espinosa, N., Boeser, F., Herrera, T. C., ... & Zentner,  
1260 J. (2014). Blood pressure control with selective vagal nerve stimulation and minimal side  
1261 effects. *Journal of neural engineering*, 11(3), 036011.
- 1262 Ganzer, P. D., Darrow, M. J., Meyers, E. C., Solorzano, B. R., Ruiz, A. D., Robertson, N. M., ...  
1263 & Goldberg, M. P. (2018). Closed-loop neuromodulation restores network connectivity and motor  
1264 control after spinal cord injury. *Elife*, 7, e32058.

- 1265 Meyers, E. C., Kasliwal, N., Solorzano, B. R., Lai, E., Bendale, G., Berry, A., ... & Hays, S. A.  
1266 (2019). Enhancing plasticity in central networks improves motor and sensory recovery after nerve  
1267 damage. *Nature communications*, 10(1), 1-14.
- 1268 Sachdeva, R., Krassioukov, A. V., Bucksot, J. E., & Hays, S. A. (2020). Acute Cardiovascular  
1269 Responses to Vagus Nerve Stimulation after Experimental Spinal Cord Injury. *Journal of*  
1270 *Neurotrauma*, 37(9), 1149-1155.
- 1271 Lewis, M. E., Al-Khalidi, A. H., Bonser, R. S., Clutton-Brock, T., Morton, D., Paterson, D., ... &  
1272 Coote, J. H. (2001). Vagus nerve stimulation decreases left ventricular contractility in vivo in the  
1273 human and pig heart. *The Journal of physiology*, 534(Pt 2), 547.
- 1274 Yamakawa, K., So, E. L., Rajendran, P. S., Hoang, J. D., Makkar, N., Mahajan, A., ... & Vaseghi,  
1275 M. (2014). Electrophysiological effects of right and left vagal nerve stimulation on the ventricular  
1276 myocardium. *American Journal of Physiology-Heart and Circulatory Physiology*, 307(5), H722-  
1277 H731.
- 1278 Shinlapawittayatorn, K., Chinda, K., Palee, S., Surinkaew, S., Thunsiri, K., Weerateerangkul, P.,  
1279 ... & Chattipakorn, N. (2013). Low-amplitude, left vagus nerve stimulation significantly attenuates  
1280 ventricular dysfunction and infarct size through prevention of mitochondrial dysfunction during  
1281 acute ischemia-reperfusion injury. *Heart Rhythm*, 10(11), 1700-1707.
- 1282 Vimercati, C., Qanud, K., Ilsar, I., Mitacchione, G., Sarnari, R., Mania, D., ... & Recchia, F. A.  
1283 (2012). Acute vagal stimulation attenuates cardiac metabolic response to  $\beta$ -adrenergic stress. *The*  
1284 *Journal of Physiology*, 590(23), 6065-6074.
- 1285 Zhang, Y., & Mazgalev, T. N. (2009). Cardiac vagal stimulation eliminates detrimental  
1286 tachycardia effects of dobutamine used for inotropic support. *The Annals of thoracic*  
1287 *surgery*, 88(1), 117-122.
- 1288 Berk, J. L., Hagen, J. F., Tong, R., & Maly, G. (1977). Pulmonary insufficiency produced by  
1289 norepinephrine: a comparison with epinephrine. *Circulatory Shock*, 4(3), 247-251.
- 1290 Ganzer, P. D., Colachis 4th, S. C., Schwemmer, M. A., Friedenberg, D. A., Dunlap, C. F.,  
1291 Swiftney, C. E., ... & Sharma, G. (2020). Restoring the Sense of Touch Using a Sensorimotor  
1292 Demultiplexing Neural Interface. *Cell*. 181(4):763-773.e12. doi:10.1016/j.cell.2020.03.054
- 1293 Bouton, C. E., Shaikhouni, A., Annetta, N. V., Bockbrader, M. A., Friedenberg, D. A., Nielson,  
1294 D. M., ... & Morgan, A. G. (2016). Restoring cortical control of functional movement in a human  
1295 with quadriplegia. *Nature*, 533(7602), 247-250.
- 1296
- 1297
